# Supplementary material for: Efficient total synthesis of neocryptolepine and synthetic access to 6-methylquinindoline from a common intermediate
Source: Royal Society of Chemistry journal article supplement (doi:10.1039/c7ra05349e), 2017-01-01
Supplement: c7ra05349e1.pdf [file c7ra05349e1.pdf]

## Efficient total synthesis of neocryptolepine and synthetic access to 6-methylquinindoline from a common intermediate

María V. Méndez,<sup>a</sup> Daniel A. Heredia,<sup>a,b</sup> Enrique L. Larghi,<sup>a</sup> Andrea B. J. Bracca<sup>a</sup> and Teodoro S. Kaufman<sup>a,\*</sup>

<sup>a</sup>Instituto de Química Rosario (CONICET-UNR), Suipacha 531, S2002LRK, Rosario, Santa Fe, Argentina.

Tel/Fax: +54-341-4370477, ext. 105; E-mail: kaufman@iquir-conicet.gov.ar

<sup>b</sup>Present address: Departamento de Química, Universidad Nacional de Río Cuarto, Agencia Postal No 3, X5804BYA, Río Cuarto, Córdoba, Argentina

### Table of Contents

| Description                                                                                                                                                                         | Page N° |
|-------------------------------------------------------------------------------------------------------------------------------------------------------------------------------------|---------|
| <b>Figure S1.</b> <sup>1</sup> H and <sup>13</sup> C NMR spectra of compound <b>15</b>                                                                                              | S-3     |
| <b>Figure S2.</b> COSY and HMBC spectra of compound <b>15</b>                                                                                                                       | S-4     |
| <b>Figure S3.</b> HSQC spectrum of compound <b>15</b>                                                                                                                               | S-5     |
| <b>Figure S4.</b> <sup>1</sup> H and <sup>13</sup> C NMR spectra of compound <b>12a</b>                                                                                             | S-6     |
| <b>Figure S5.</b> Monitoring of the formation of the acid chloride <b>12a</b> and <sup>31</sup> P NMR spectrum of the phosphorus species in the reaction toward compound <b>12a</b> | S-7     |
| <b>Figure S6.</b> <sup>1</sup> H and <sup>13</sup> C NMR spectra of compound <b>16</b>                                                                                              | S-8     |
| <b>Figure S7.</b> COSY and zoom of COSY spectra of compound <b>16</b>                                                                                                               | S-9     |
| <b>Figure S8.</b> HSQC spectrum of compound <b>16</b>                                                                                                                               | S-10    |
| <b>Figure S9.</b> HMBC and zoom of HMBC spectra of compound <b>16</b>                                                                                                               | S-11    |
| <b>Figure S10.</b> <sup>1</sup> H and <sup>13</sup> C NMR spectra of compound <b>11</b>                                                                                             | S-12    |
| <b>Figure S11.</b> COSY and HSQC spectra of compound <b>11</b>                                                                                                                      | S-13    |
| <b>Figure S12.</b> HMBC spectrum of compound <b>11</b>                                                                                                                              | S-14    |
| <b>Figure S13.</b> <sup>1</sup> H and <sup>13</sup> C NMR spectra of compound <b>18</b>                                                                                             | S-15    |
| <b>Figure S14.</b> COSY and HSQC spectra of compound <b>18</b>                                                                                                                      | S-16    |
| <b>Figure S15.</b> HMBC spectrum of compound <b>18</b>                                                                                                                              | S-17    |
| <b>Figure S16.</b> <sup>1</sup> H and <sup>13</sup> C NMR spectra of compound <b>17</b>                                                                                             | S-18    |

| <b>Description (cont.)</b>                                                                           | <b>Page N°</b> |
|------------------------------------------------------------------------------------------------------|----------------|
| <b>Figure S17.</b> COSY and HMBC spectra of compound <b>17</b>                                       | S-19           |
| <b>Figure S18.</b> Zoom of HMBC and HSQC spectra of compound <b>17</b>                               | S-20           |
| <b>Figure S19.</b> $^1\text{H}$ and $^{13}\text{C}$ NMR spectra of compound <b>8</b>                 | S-21           |
| <b>Figure S20.</b> COSY and HMBC spectra of compound <b>8</b>                                        | S-22           |
| <b>Figure S21.</b> $^1\text{H}$ (top) and $^{13}\text{C}$ (bottom) NMR spectra of compound <b>10</b> | S-23           |
| <b>Figure S22.</b> COSY and HSQC spectra of compound <b>10</b>                                       | S-24           |
| <b>Figure S23.</b> HMBC spectrum of compound <b>10</b>                                               | S-25           |
| <b>Figure S24.</b> $^1\text{H}$ (top) and $^{13}\text{C}$ (bottom) NMR spectra of compound <b>14</b> | S-26           |
| <b>Figure S25.</b> COSY and HSQC spectra of compound <b>14</b>                                       | S-27           |
| <b>Figure S26.</b> HMBC spectrum of compound <b>14</b>                                               | S-28           |
| <b>Figure S27.</b> $^1\text{H}$ (top) and $^{13}\text{C}$ (bottom) NMR spectra of compound <b>19</b> | S-29           |
| <b>Figure S28.</b> COSY and HSQC spectra of compound <b>19</b>                                       | S-30           |
| <b>Figure S29.</b> HMBC spectrum of compound <b>19</b>                                               | S-31           |
| <b>Figure S30.</b> $^1\text{H}$ (top) and $^{13}\text{C}$ (bottom) NMR spectra of compound <b>1</b>  | S-32           |
| <b>Figure S31.</b> COSY and HSQC spectra of compound <b>1</b>                                        | S-33           |
| <b>Figure S32.</b> HMBC spectrum of compound <b>1</b>                                                | S-34           |



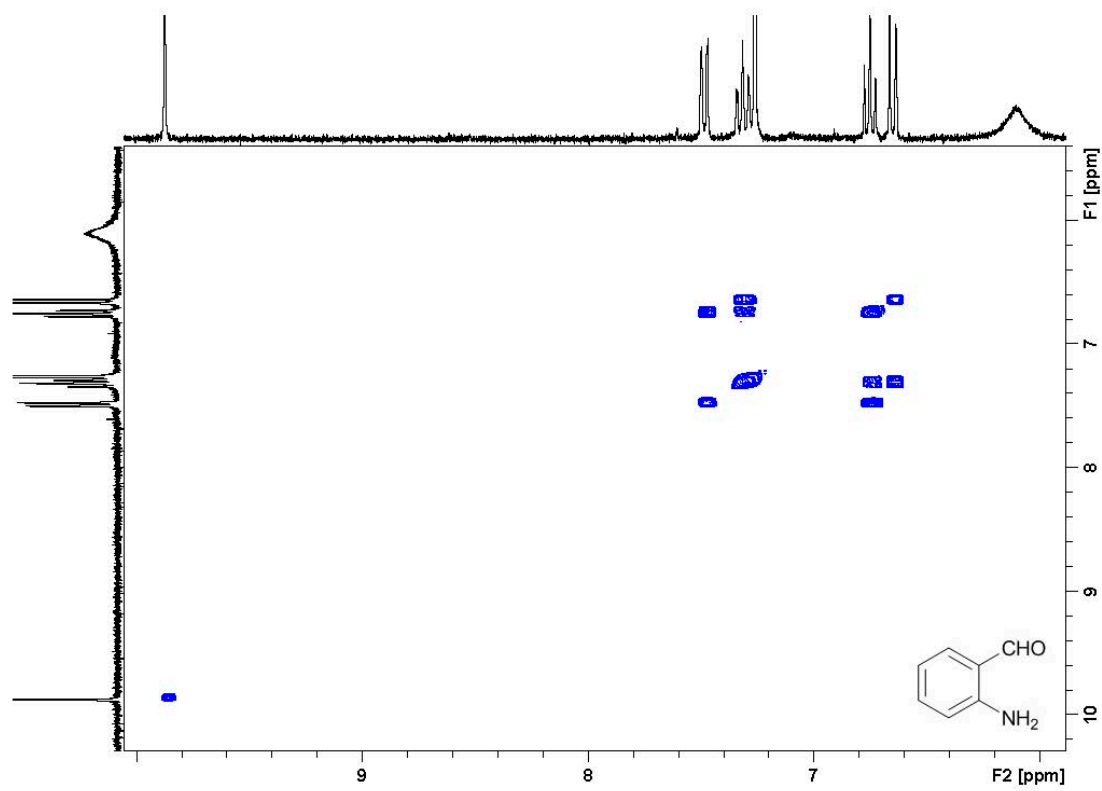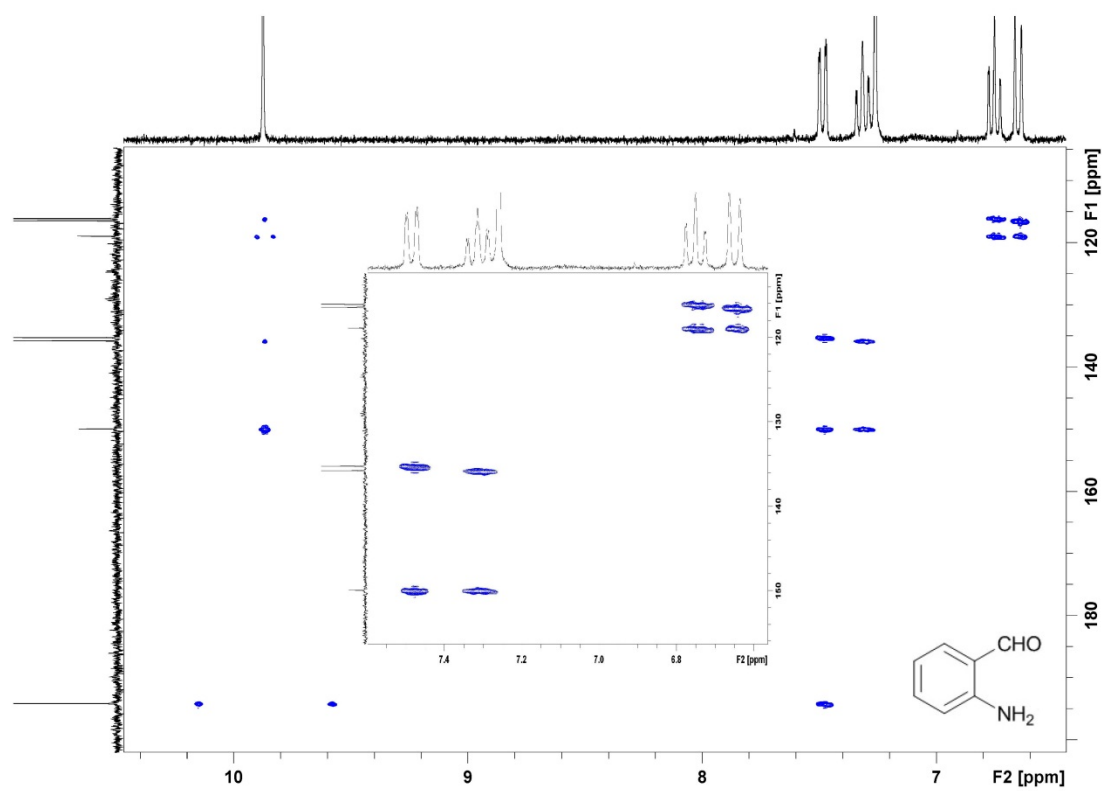

**Figure S2.** COSY (top) and HMBC (bottom) spectra of compound **15** in CDCl<sub>3</sub>.

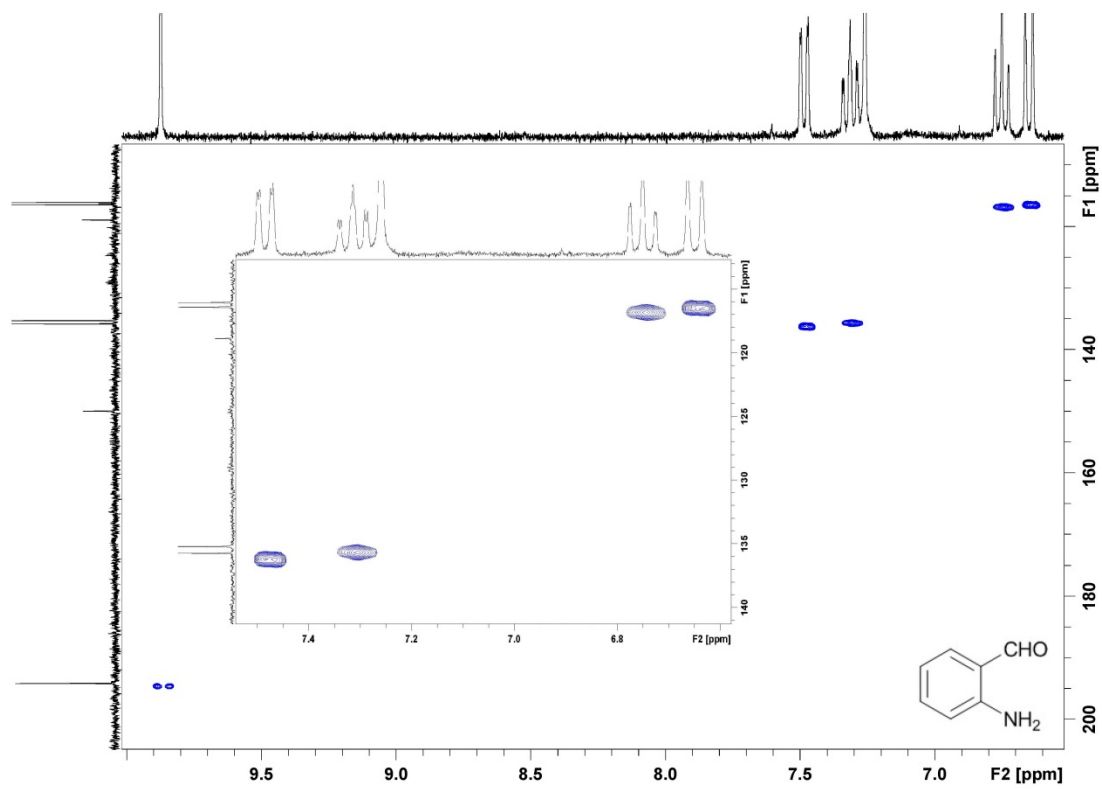

**Figure S3.** HSQC spectrum of compound **15** in CDCl<sub>3</sub>.

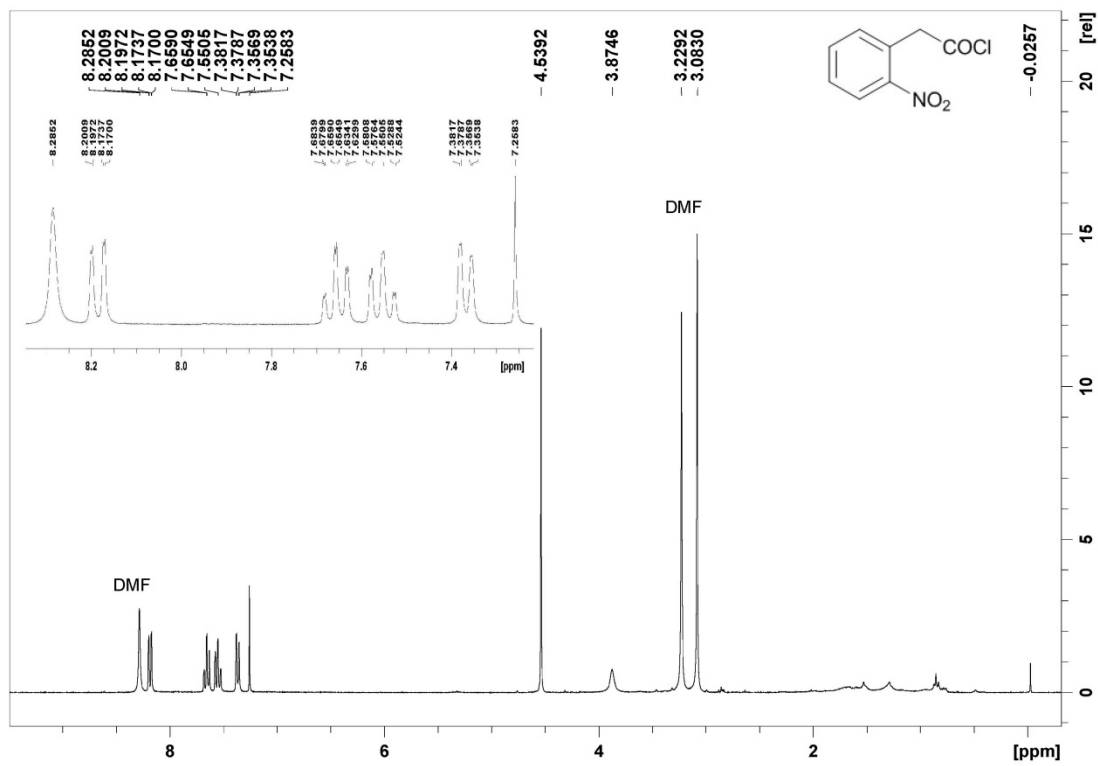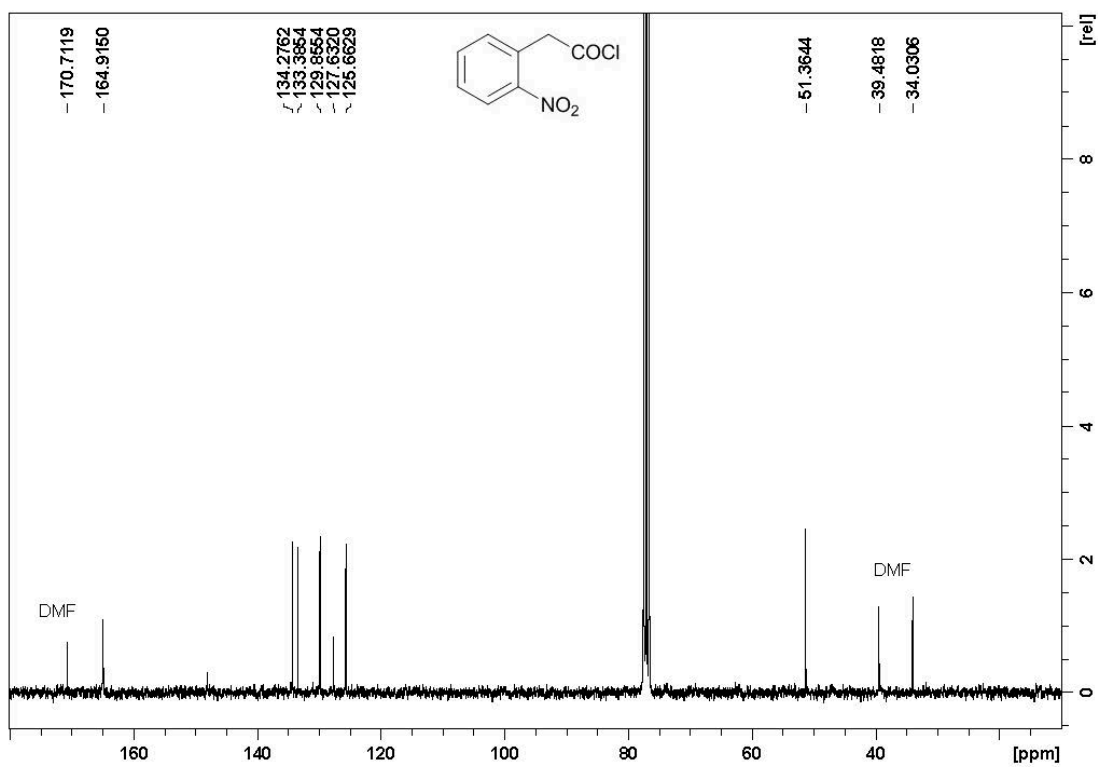

Figure S4. <sup>1</sup>H (top) and <sup>13</sup>C (bottom) NMR spectra of compound **12a** in CDCl<sub>3</sub>.

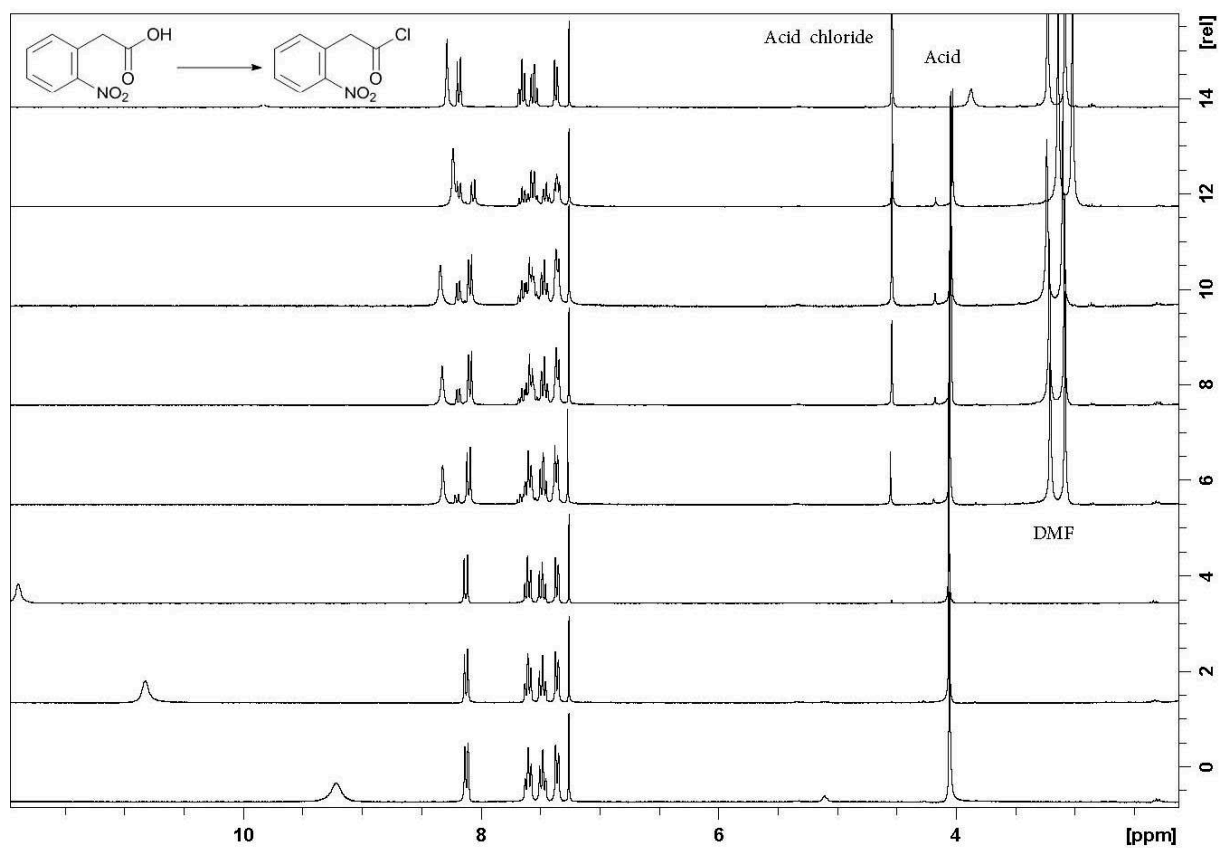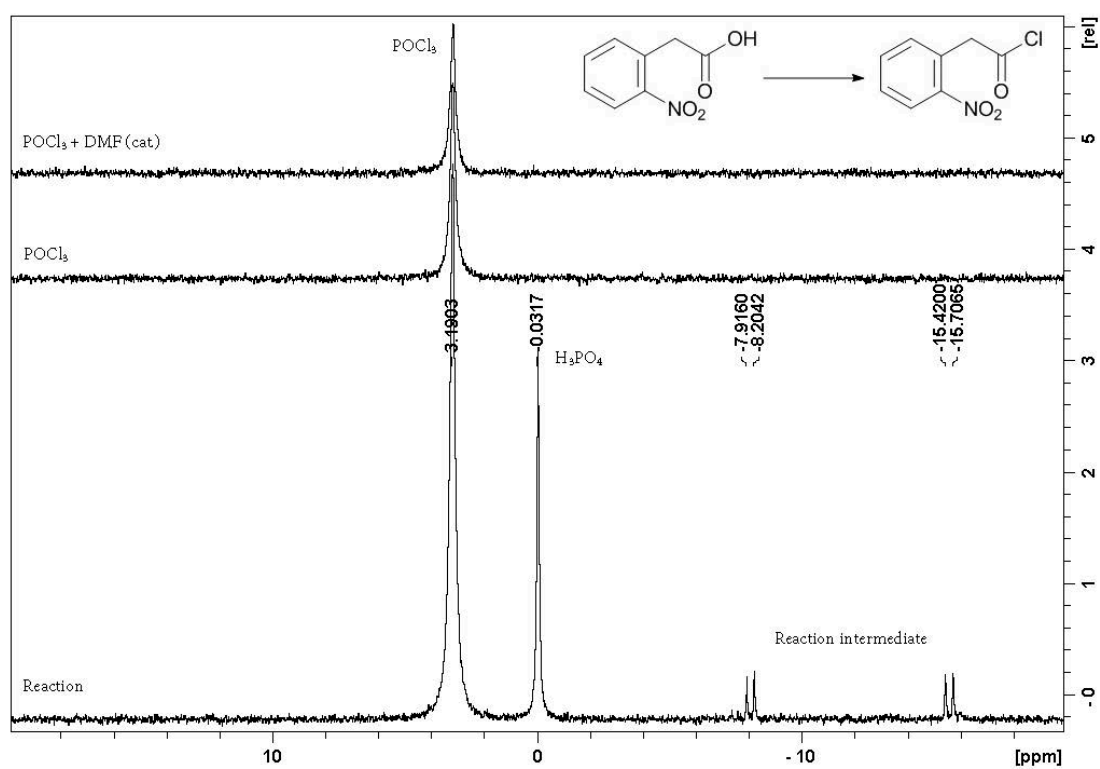

**Figure S5.** Top: Monitoring of the formation of the acid chloride **12a**. Bottom:  $^{31}\text{P}$  NMR spectra of the phosphorus species in the reaction toward compound **12a** in  $\text{CDCl}_3$ .

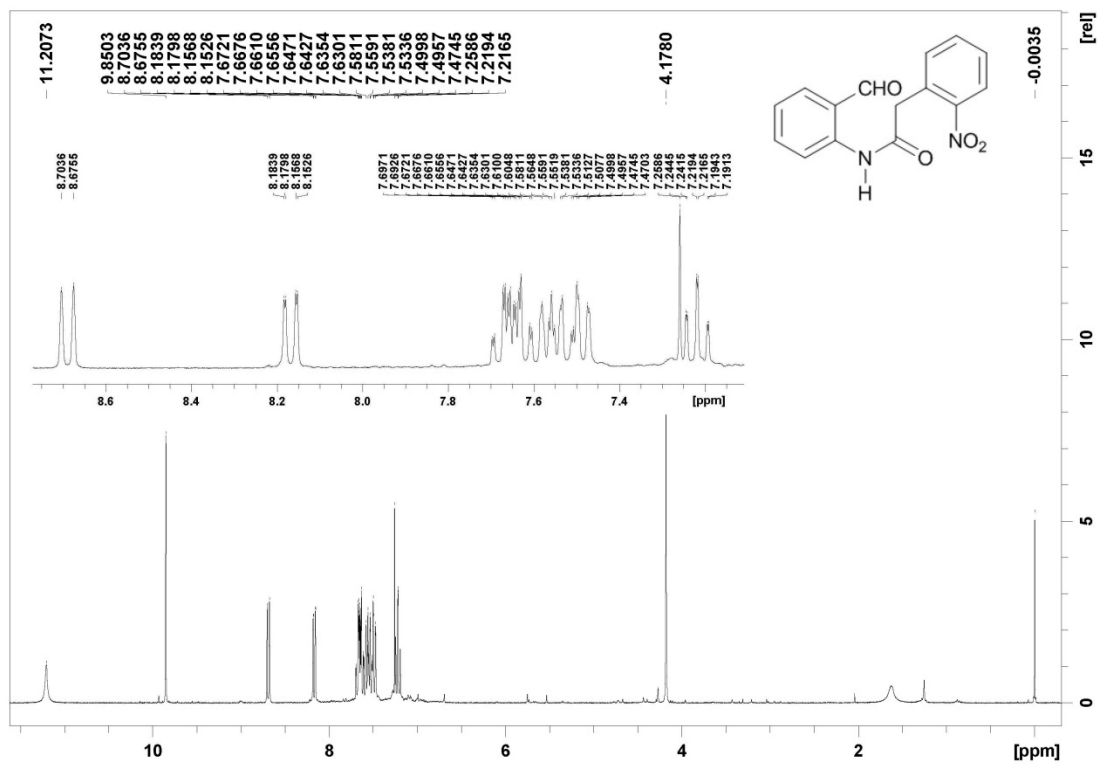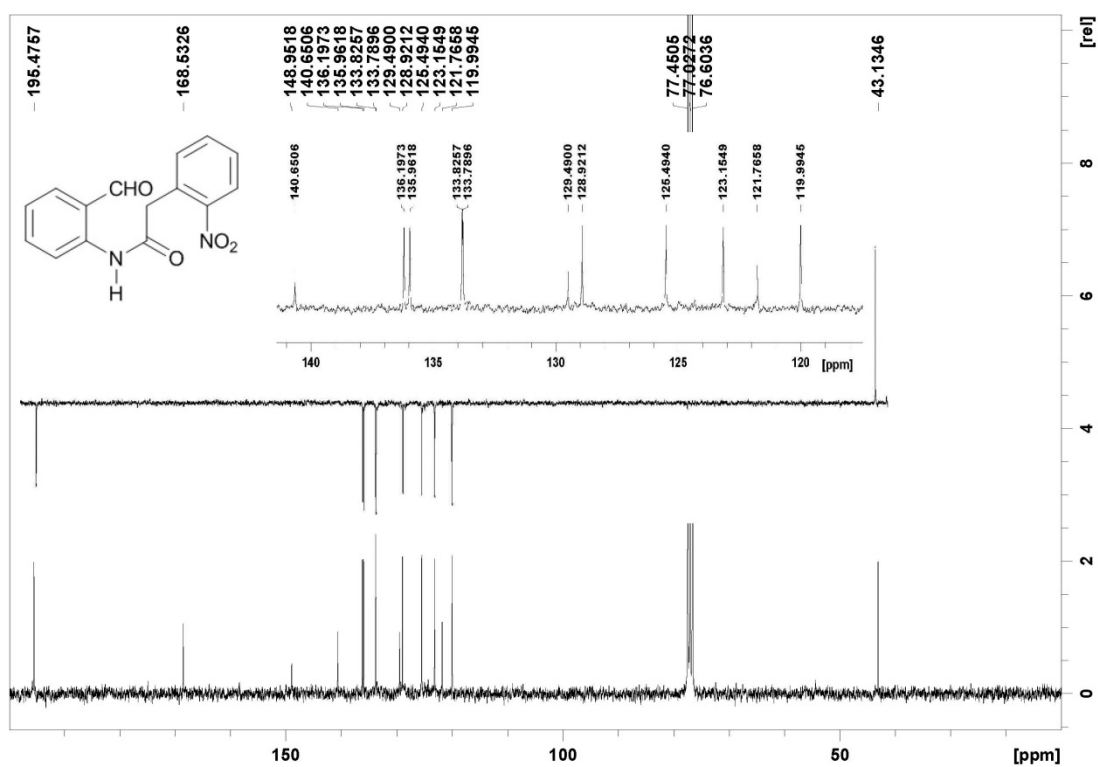

**Figure S6.** <sup>1</sup>H (top) and <sup>13</sup>C (bottom) NMR spectra of compound **16** in CDCl<sub>3</sub>.



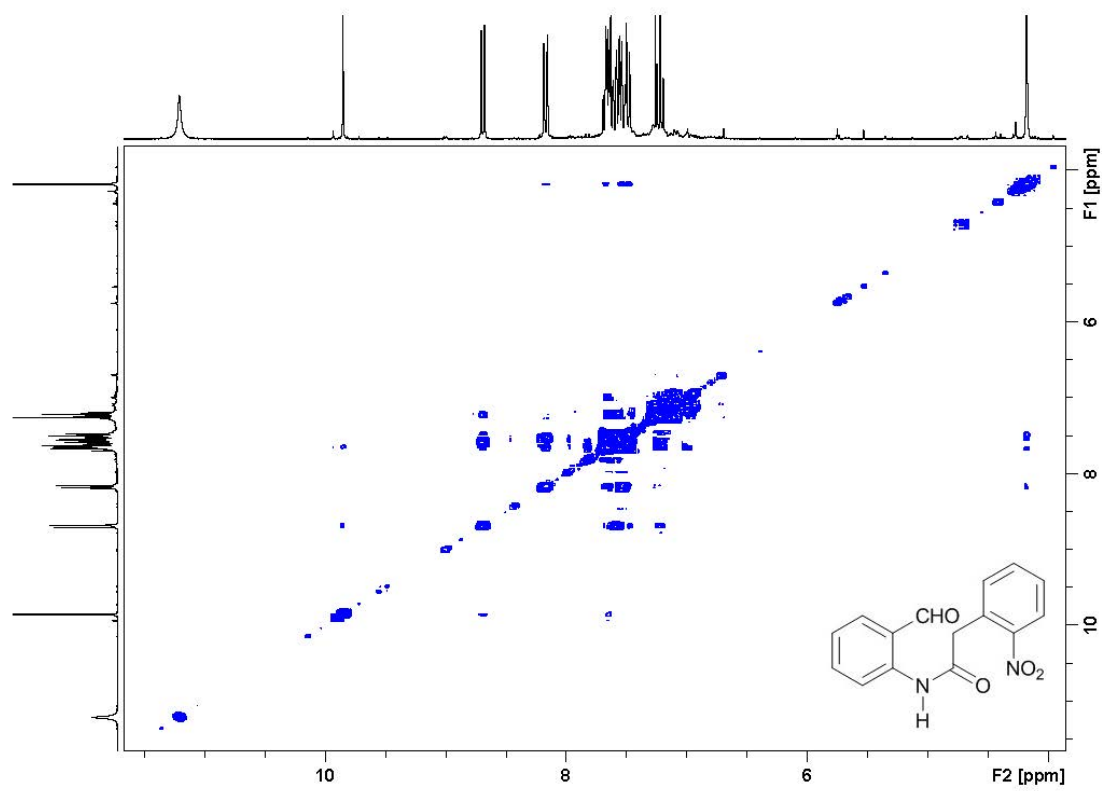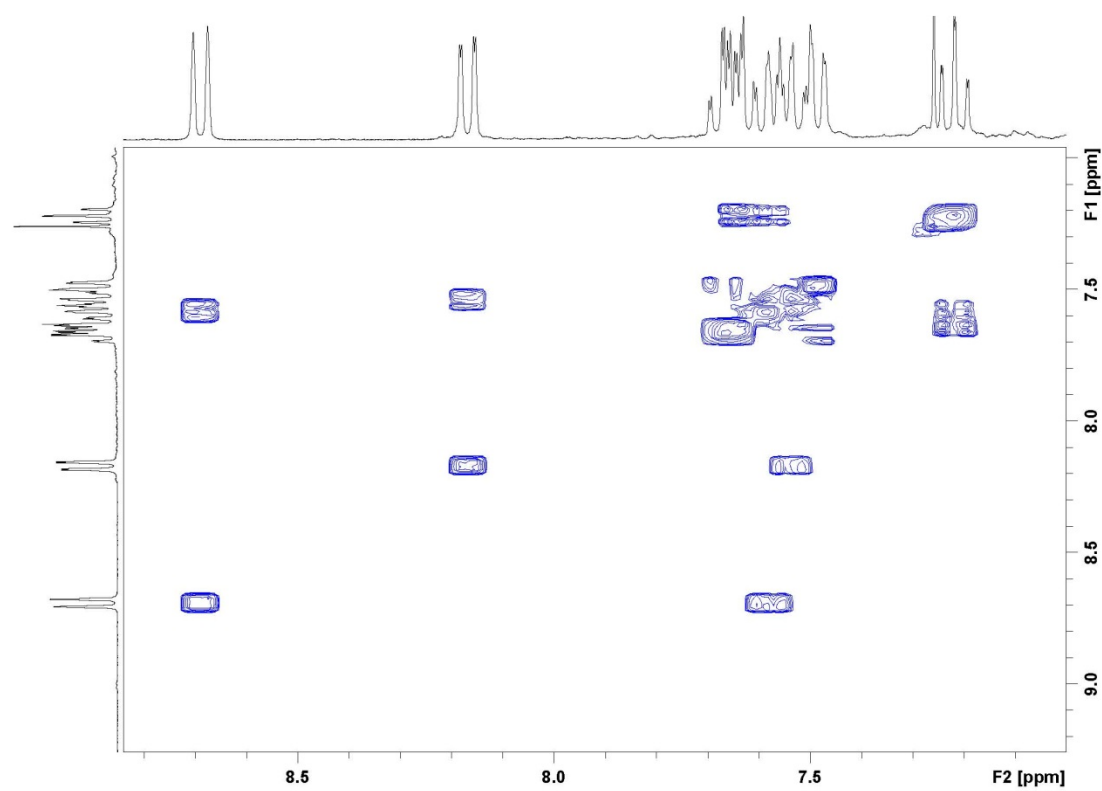

**Figure S7.** COSY (top) and zoom of COSY (bottom) spectra of compound **16** in CDCl<sub>3</sub>.

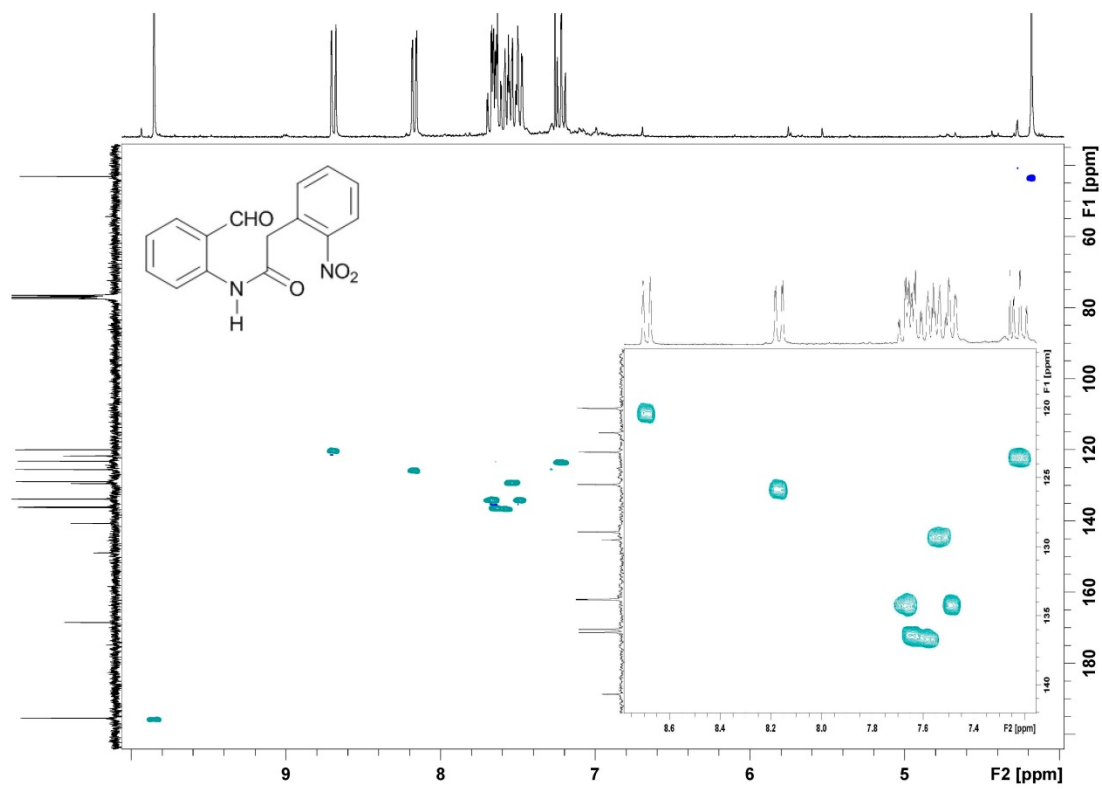

**Figure S8.** HSQC spectrum of compound **16** in CDCl<sub>3</sub>.

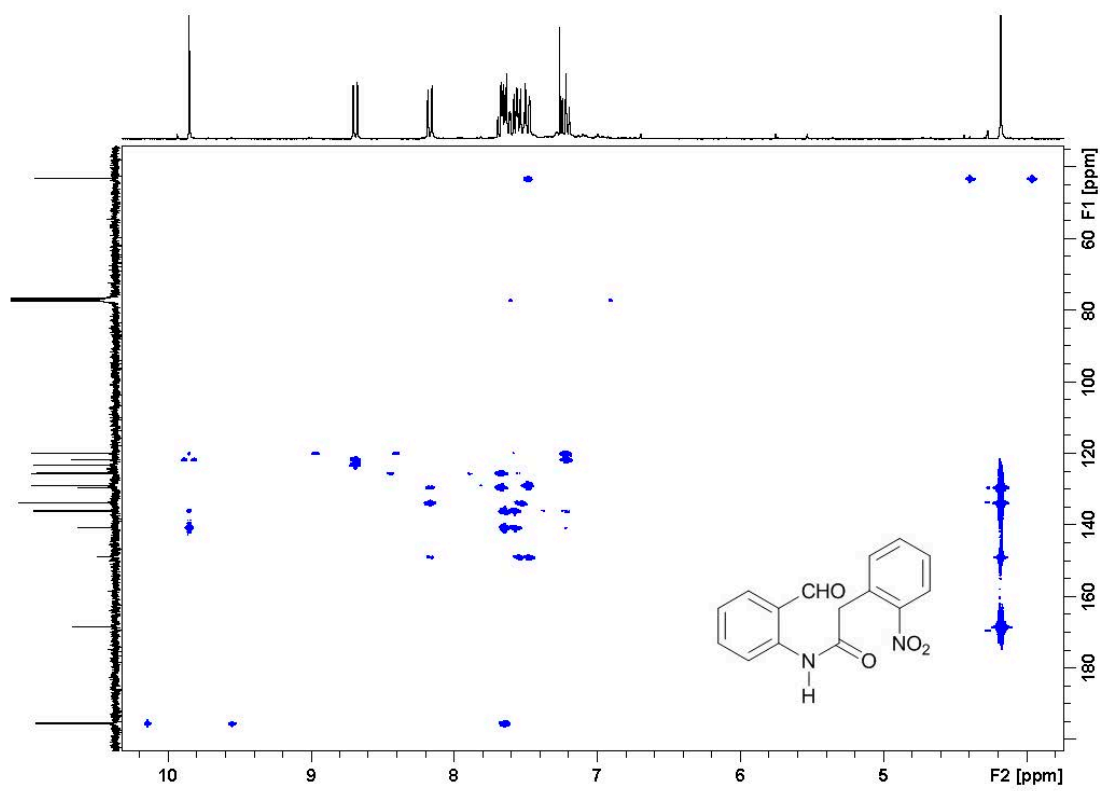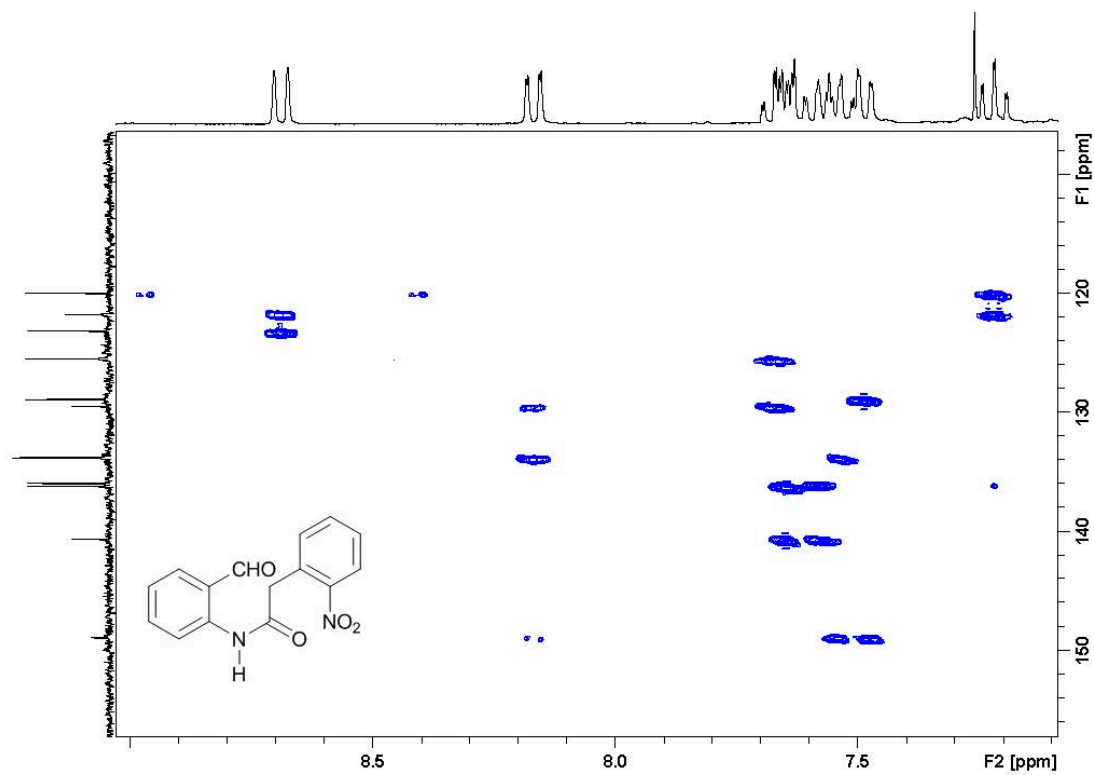

Figure S9. HMBC (top) and zoom of HMBC (bottom) spectra of compound 16 in  $\text{CDCl}_3$ .

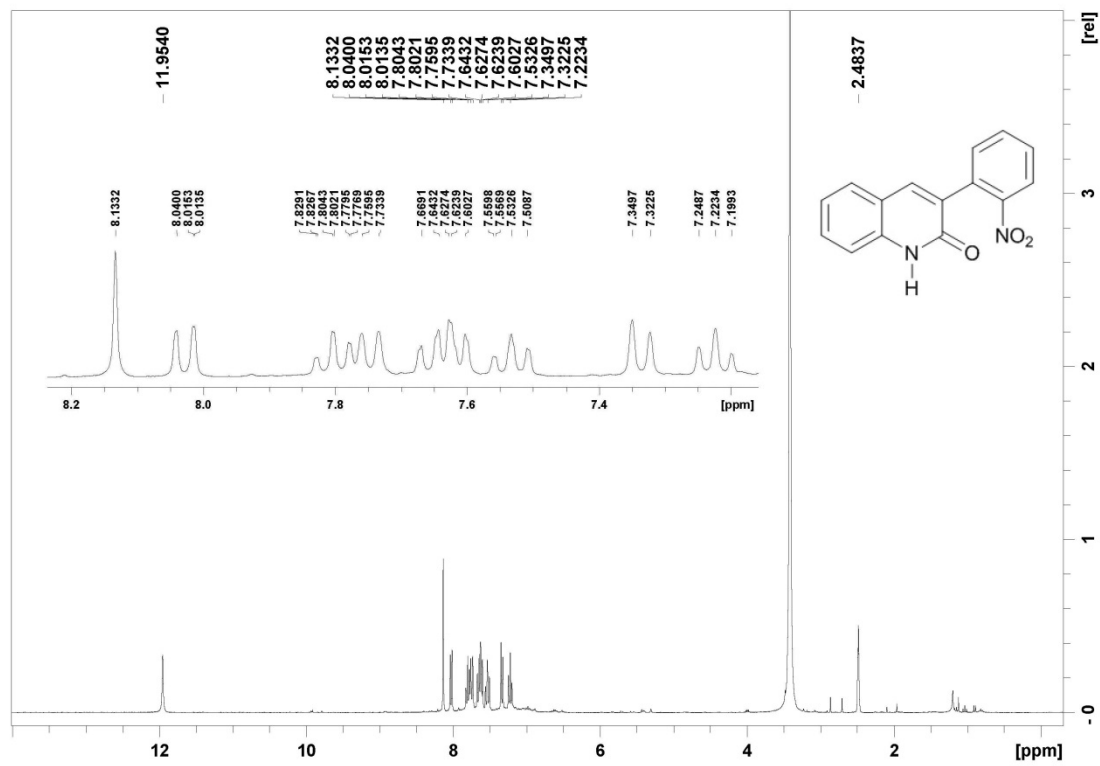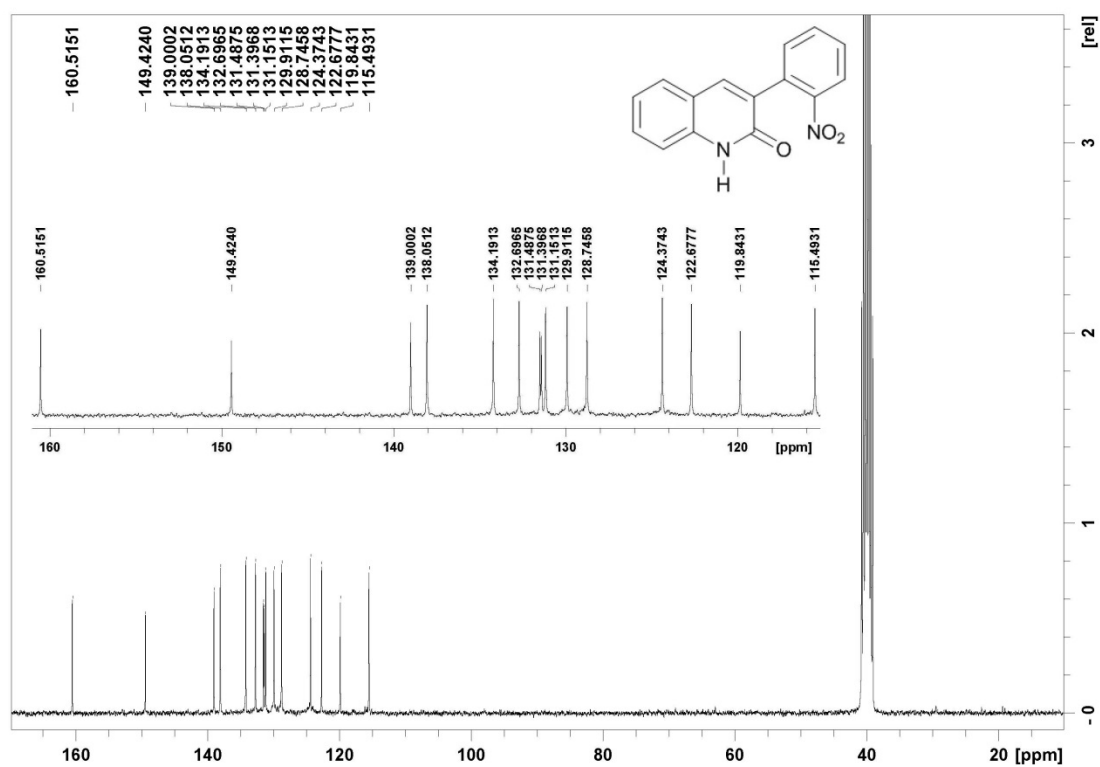

**Figure S10.** <sup>1</sup>H (top) and <sup>13</sup>C (bottom) NMR spectra of compound **11** in DMSO-*d*<sub>6</sub>.

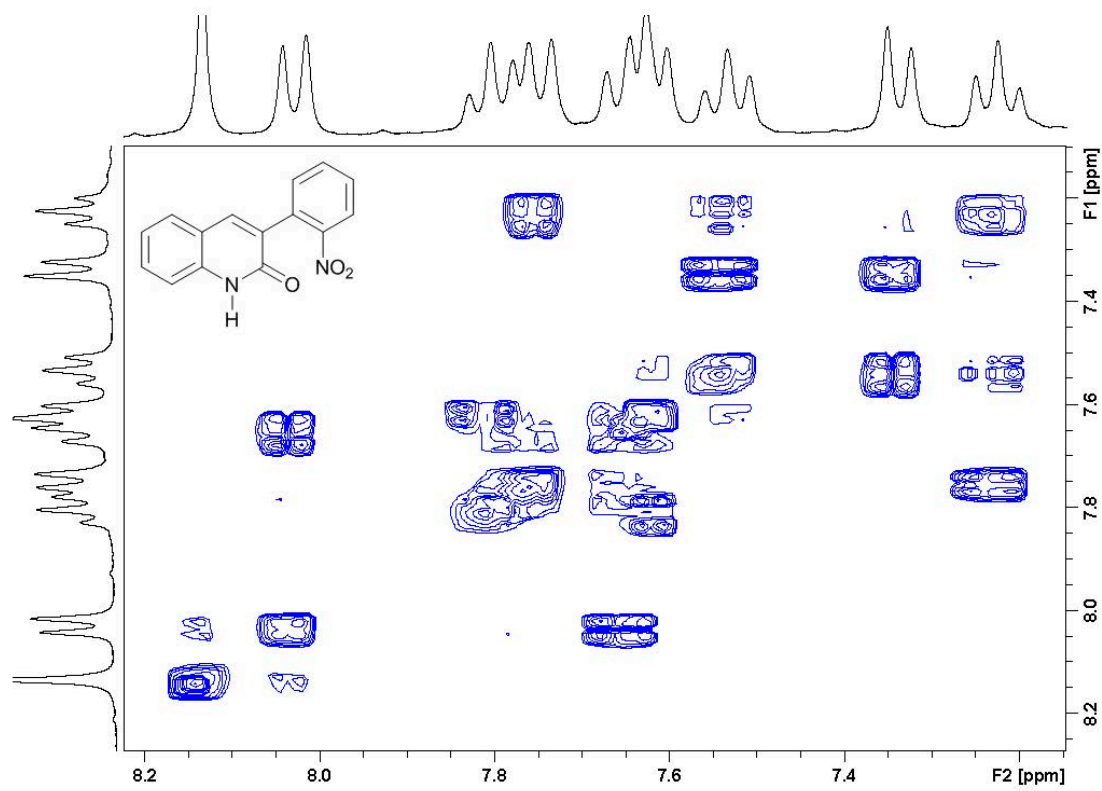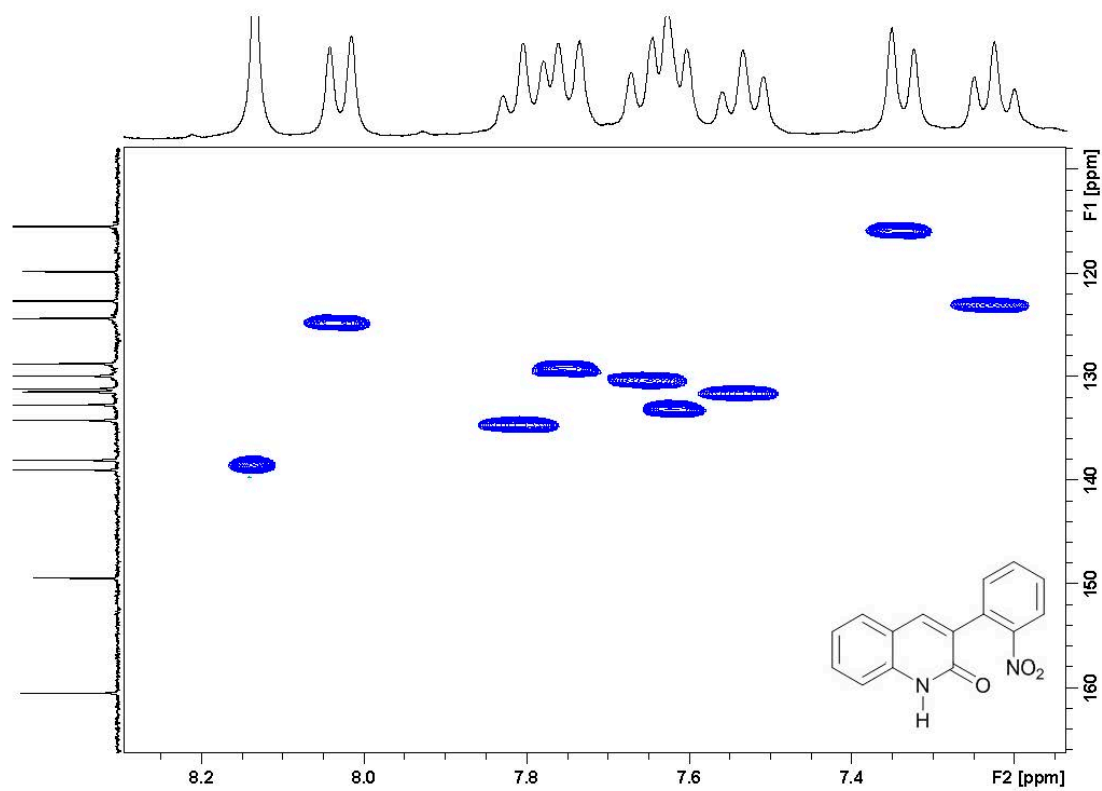

**Figure S11.** COSY (top) and HSQC (bottom) spectra of compound **11** in DMSO- $d_6$ .

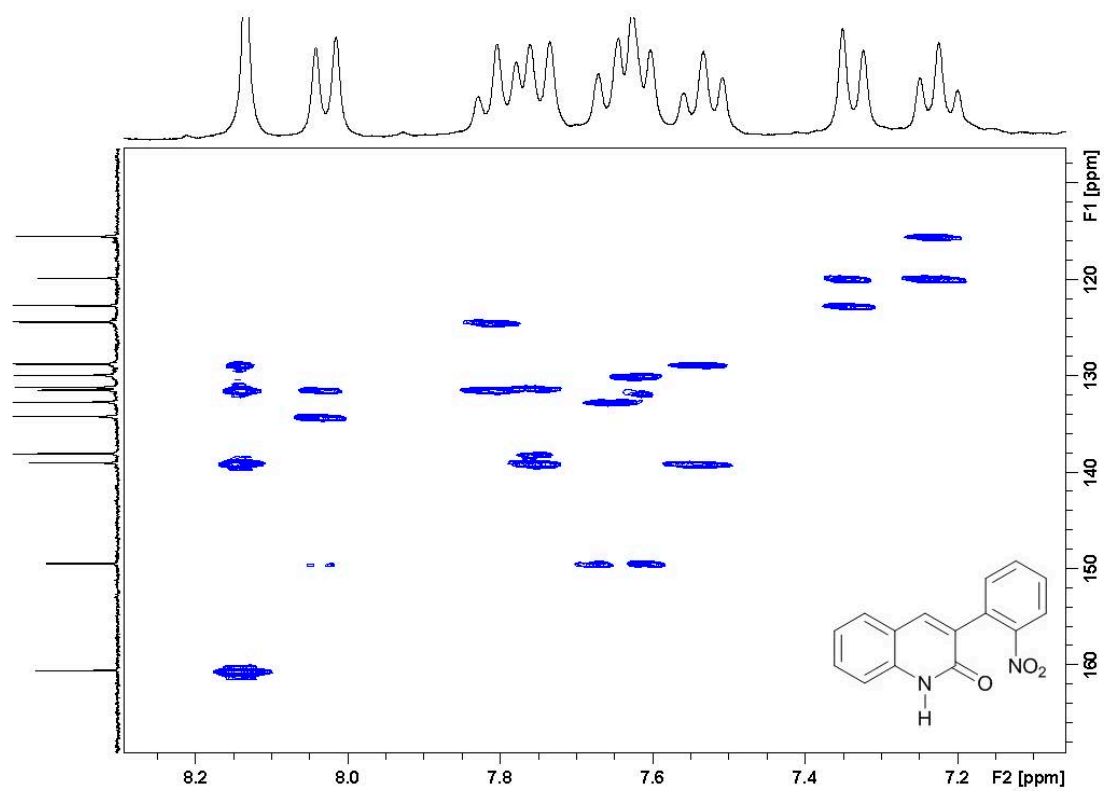

**Figure S12.** HMBC spectrum of compound **11** in DMSO- $d_6$ .

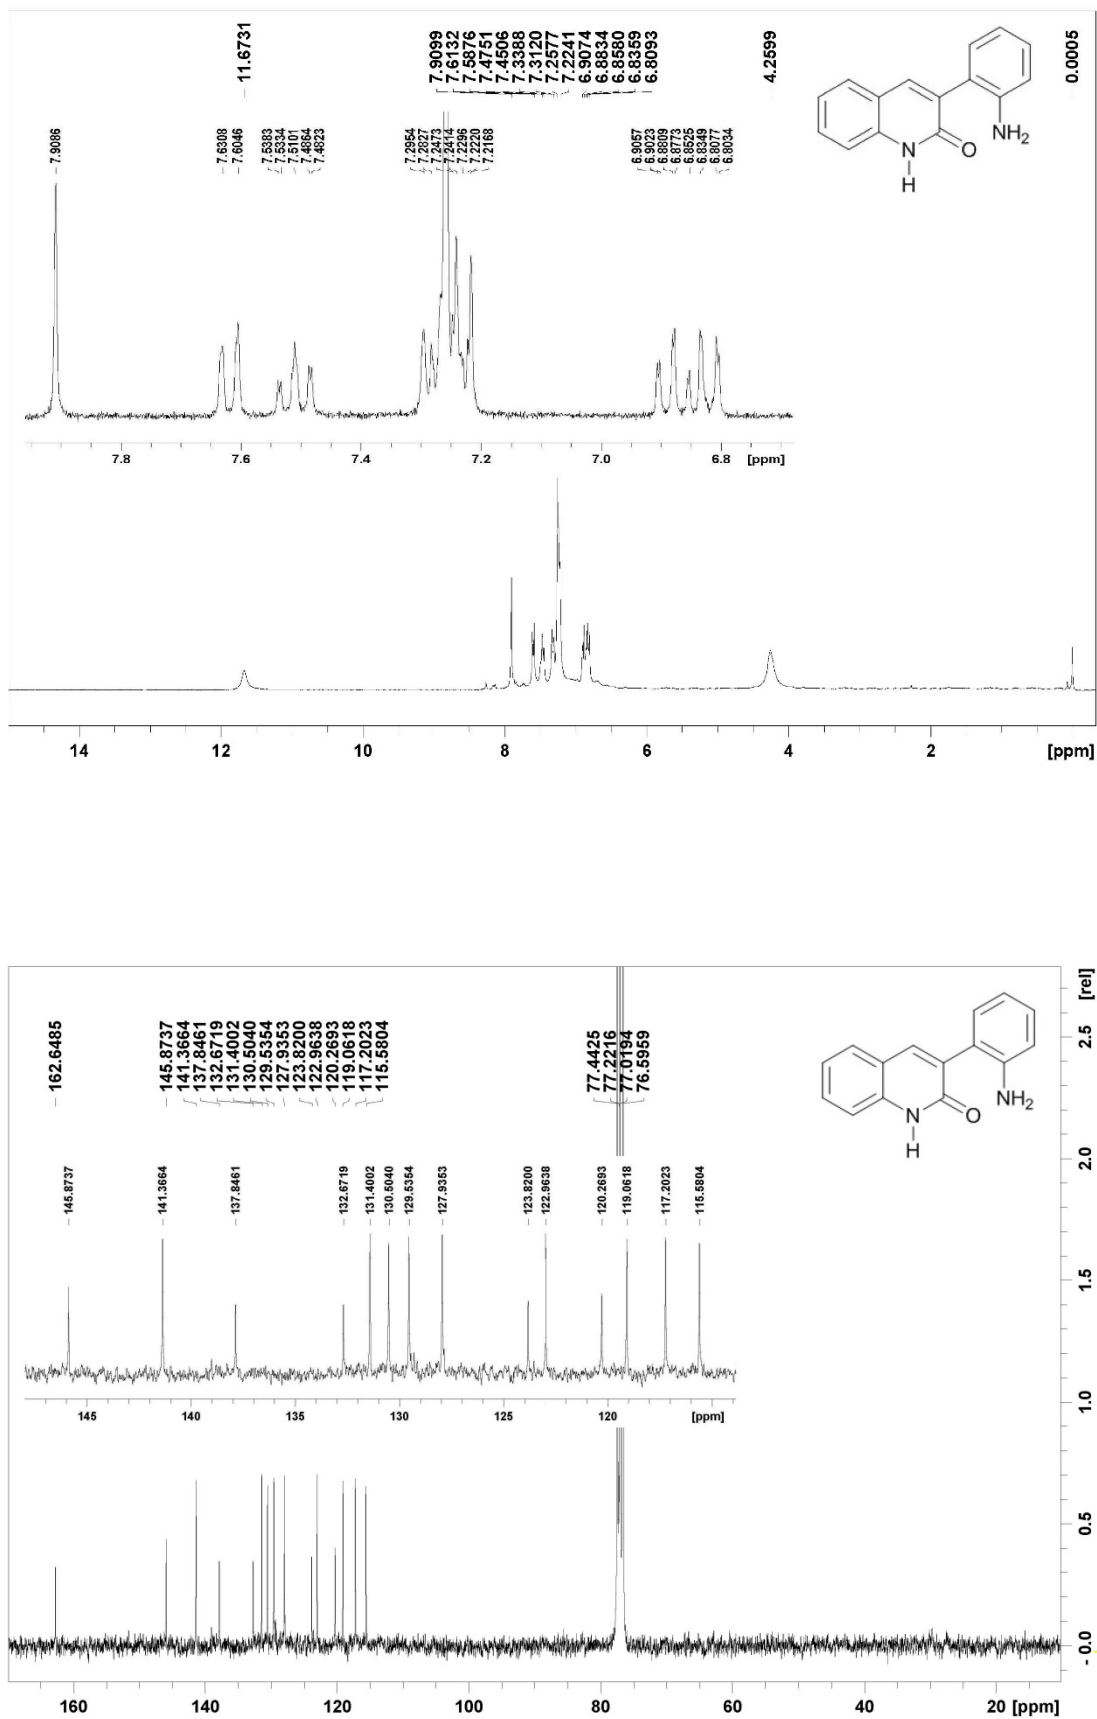

**Figure S13.** <sup>1</sup>H (top) and <sup>13</sup>C (bottom) NMR spectra of compound **18** in CDCl<sub>3</sub>.

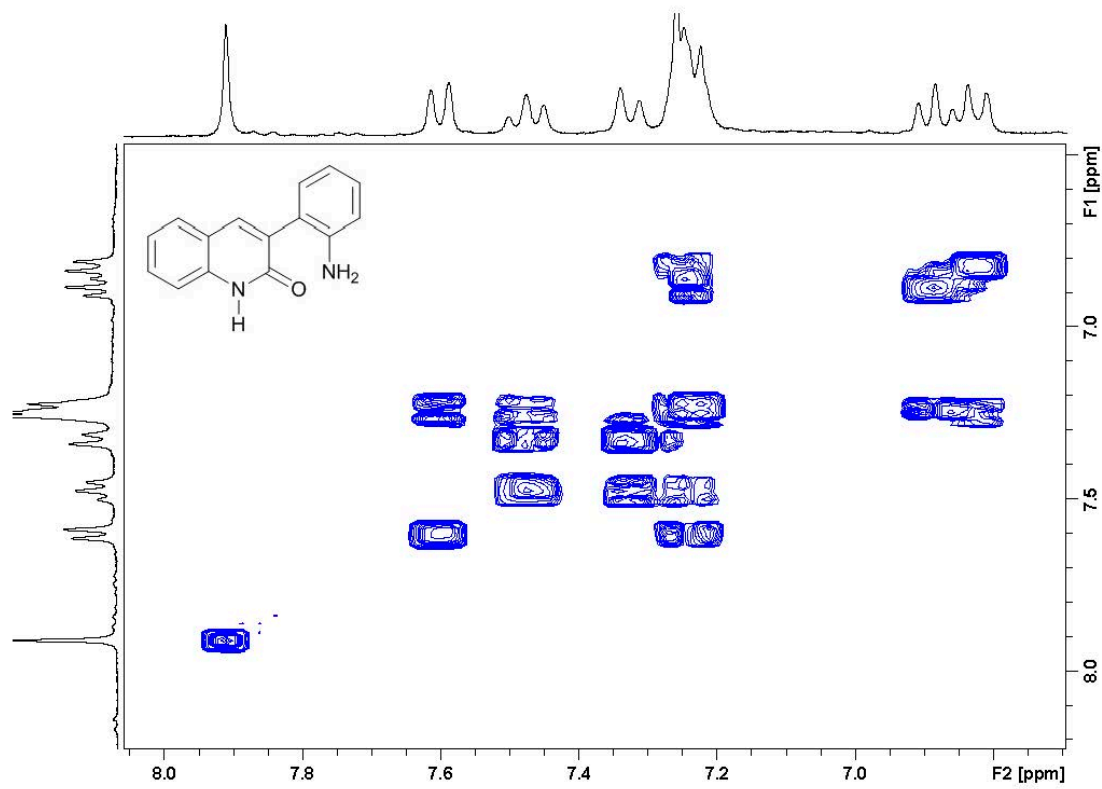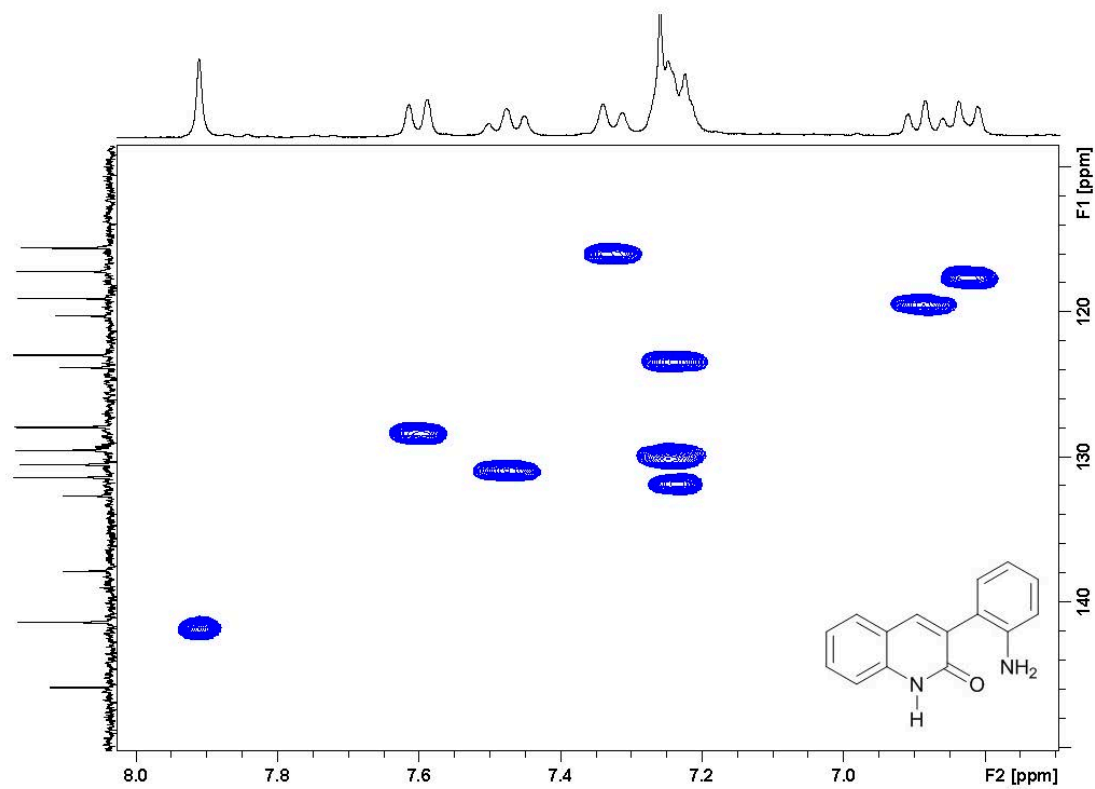

**Figure S14.** COSY (top) and HSQC (bottom) spectra of compound **18** in CDCl<sub>3</sub>.



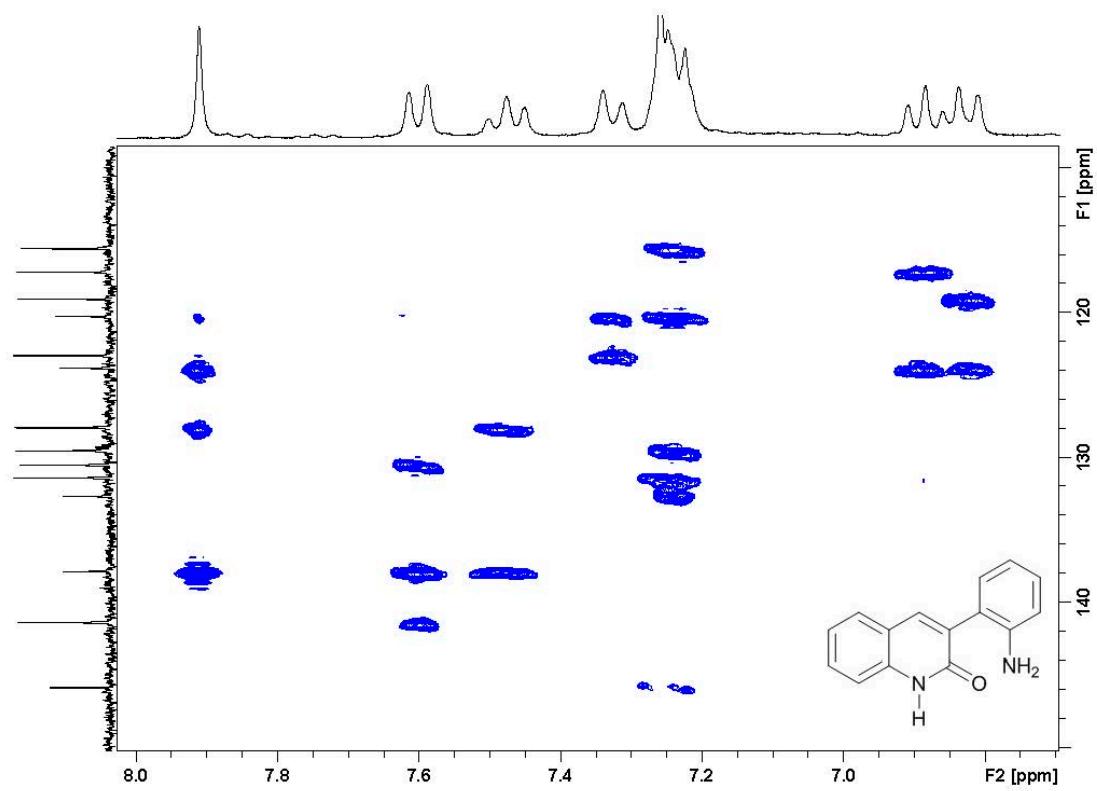

**Figure S15.** HMBC spectrum of compound **18** in CDCl<sub>3</sub>.

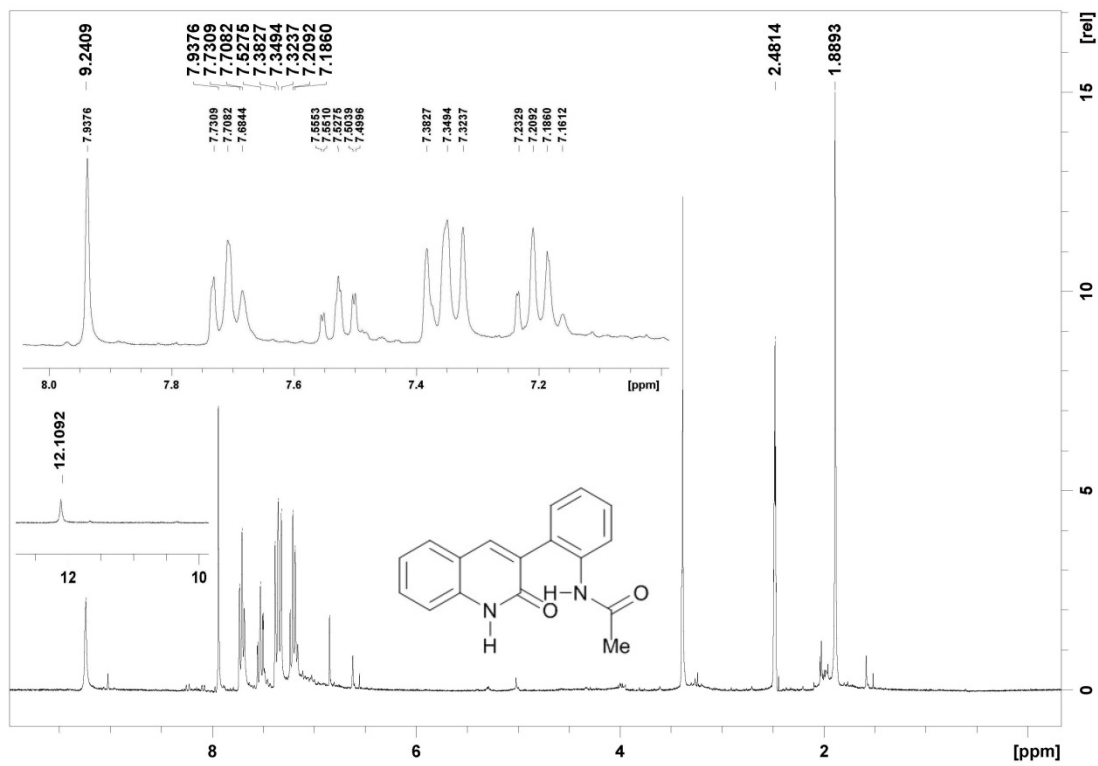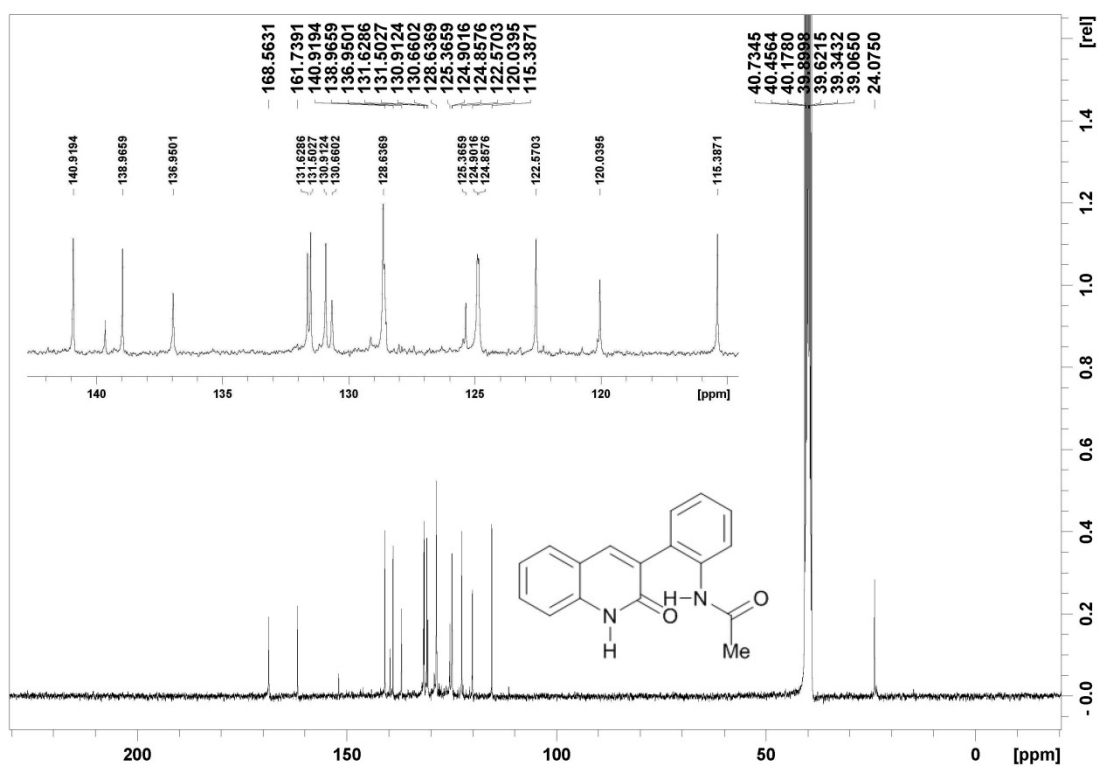

**Figure S16.** <sup>1</sup>H (top) and <sup>13</sup>C (bottom) NMR spectra of compound 17 in DMSO-*d*<sub>6</sub>.

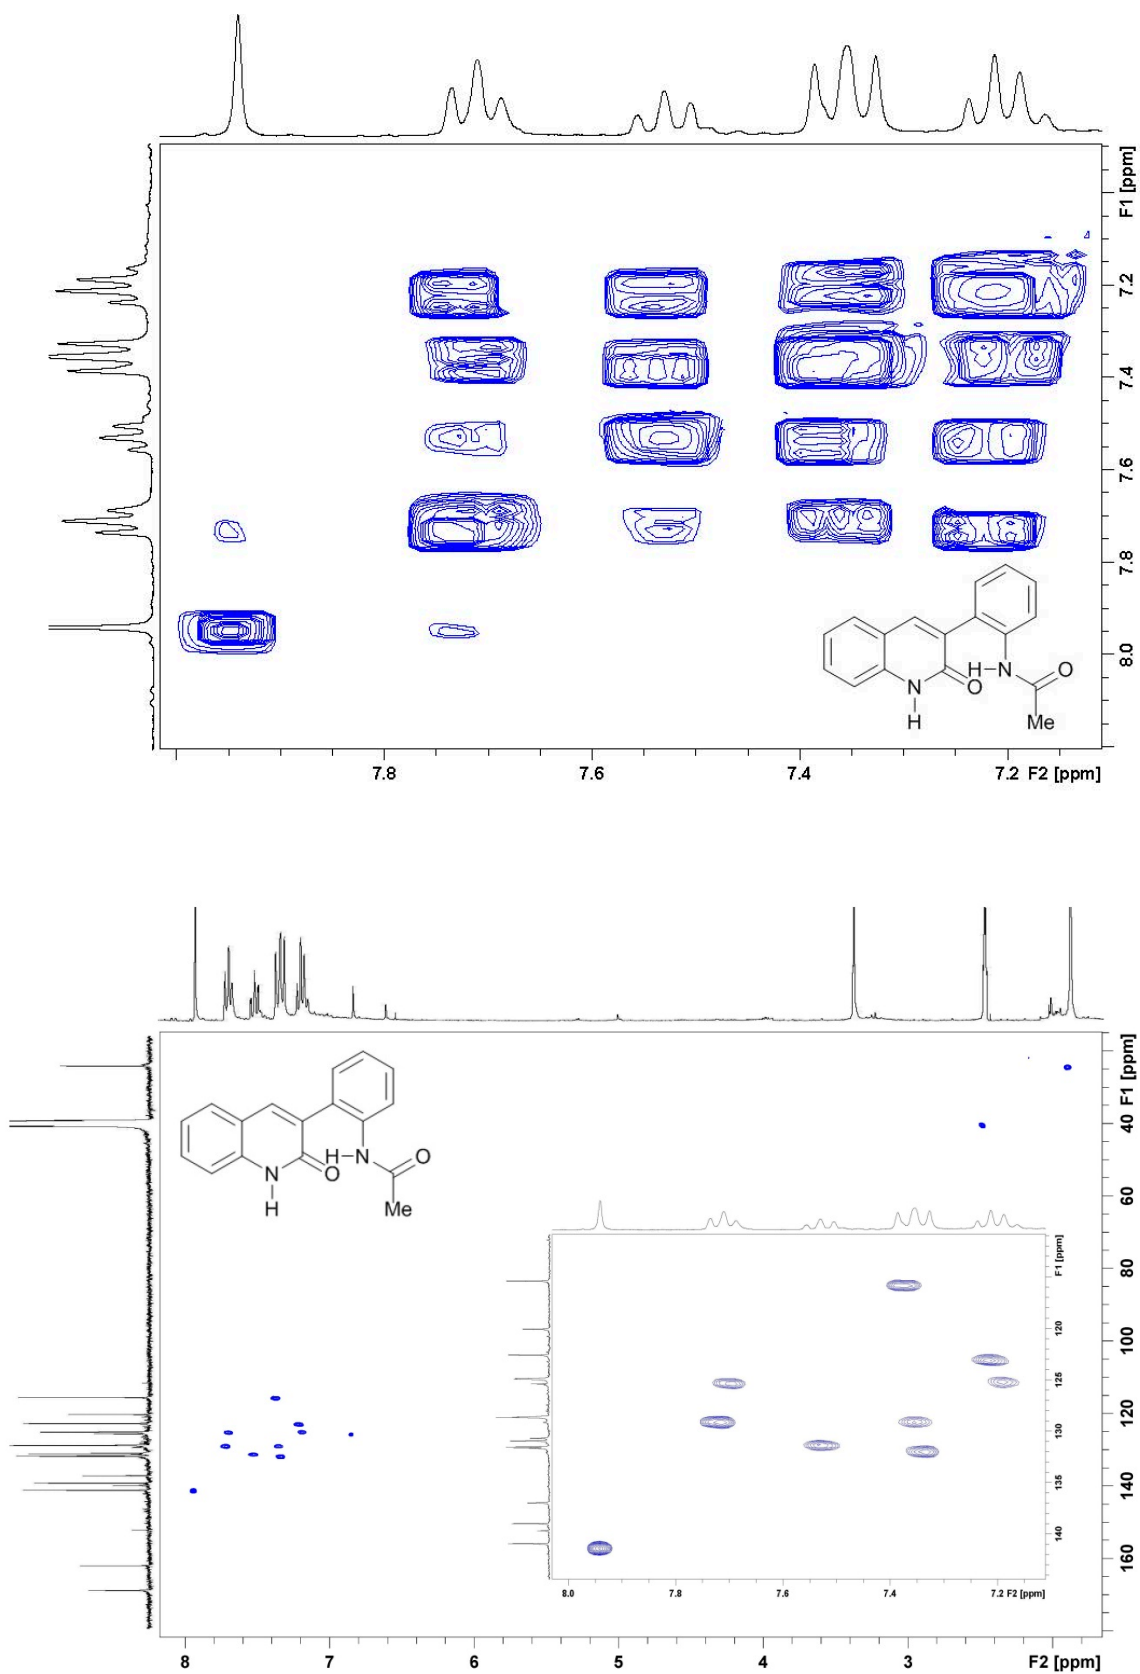

**Figure S17.** COSY (top) and HSQC (bottom) spectra of compound 17 in DMSO-*d*<sub>6</sub>.

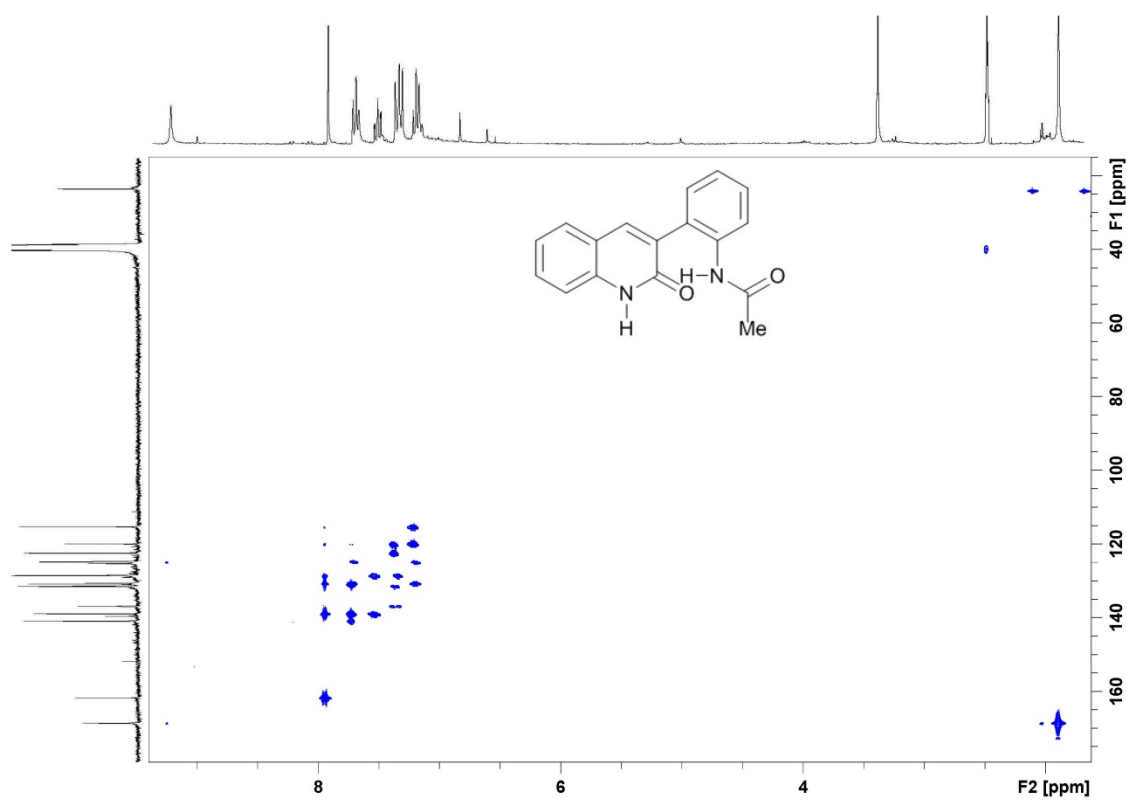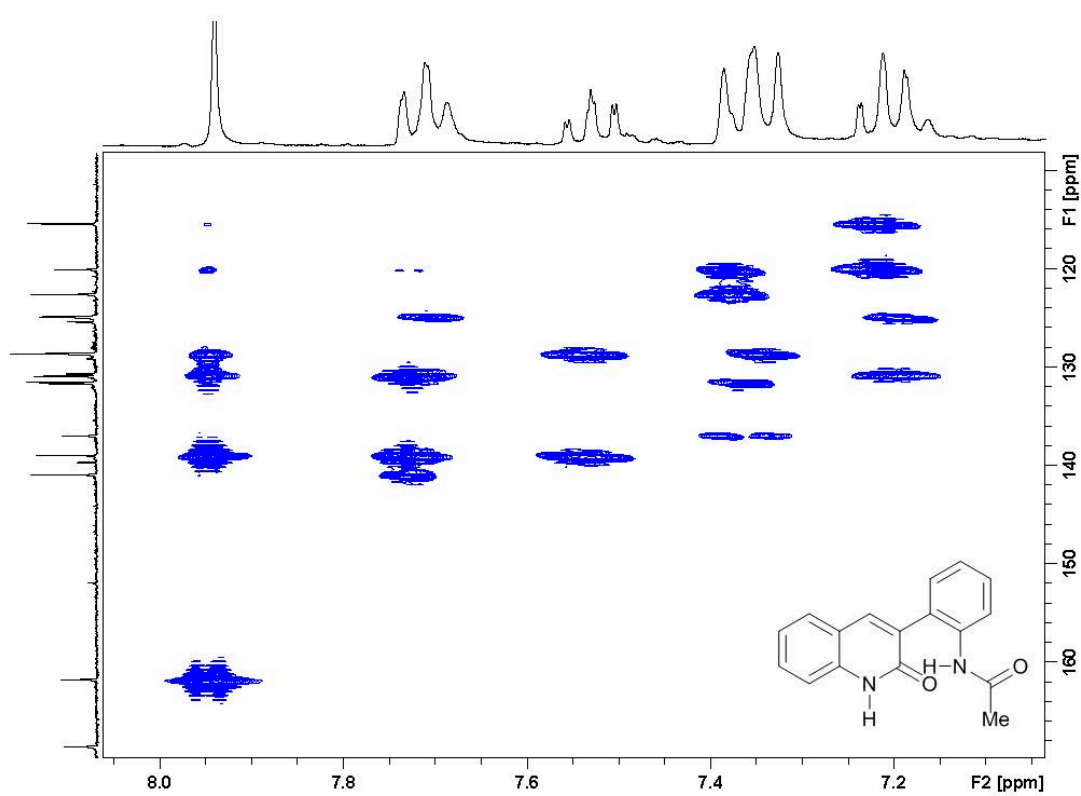

**Figure S18.** HMBC (top) and zoom of HMBC (bottom) spectra of compound **17** in  $\text{DMSO-}d_6$ .



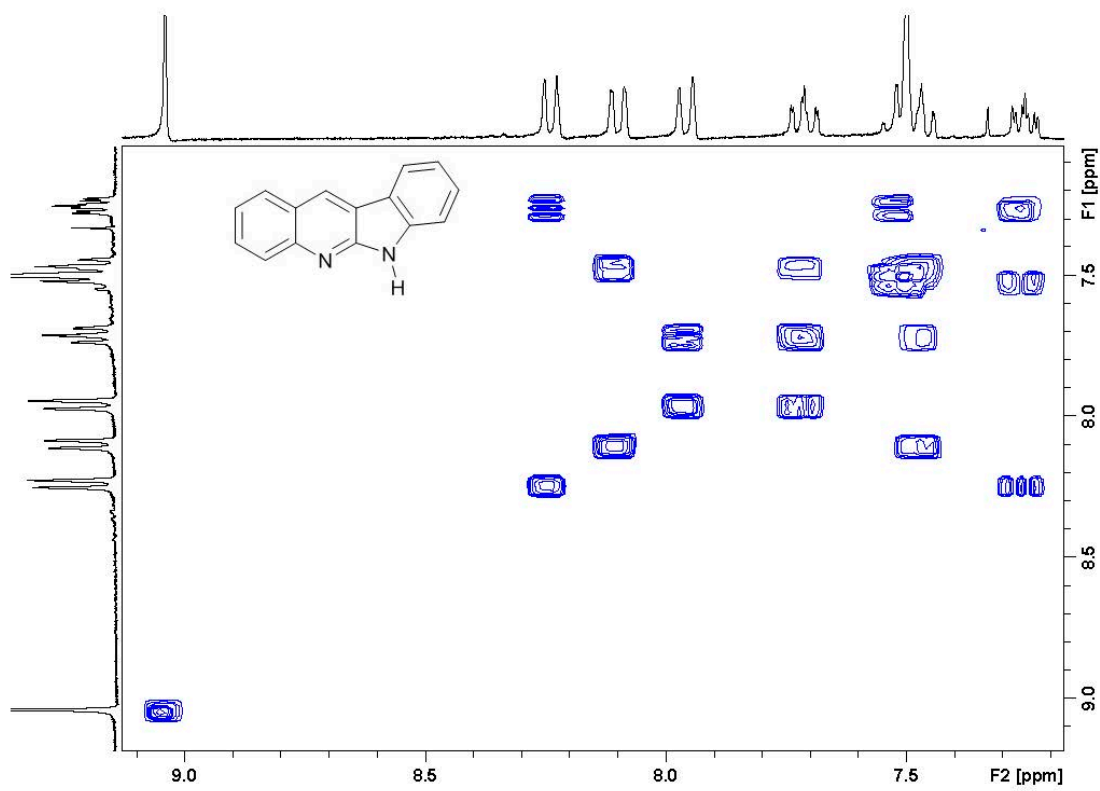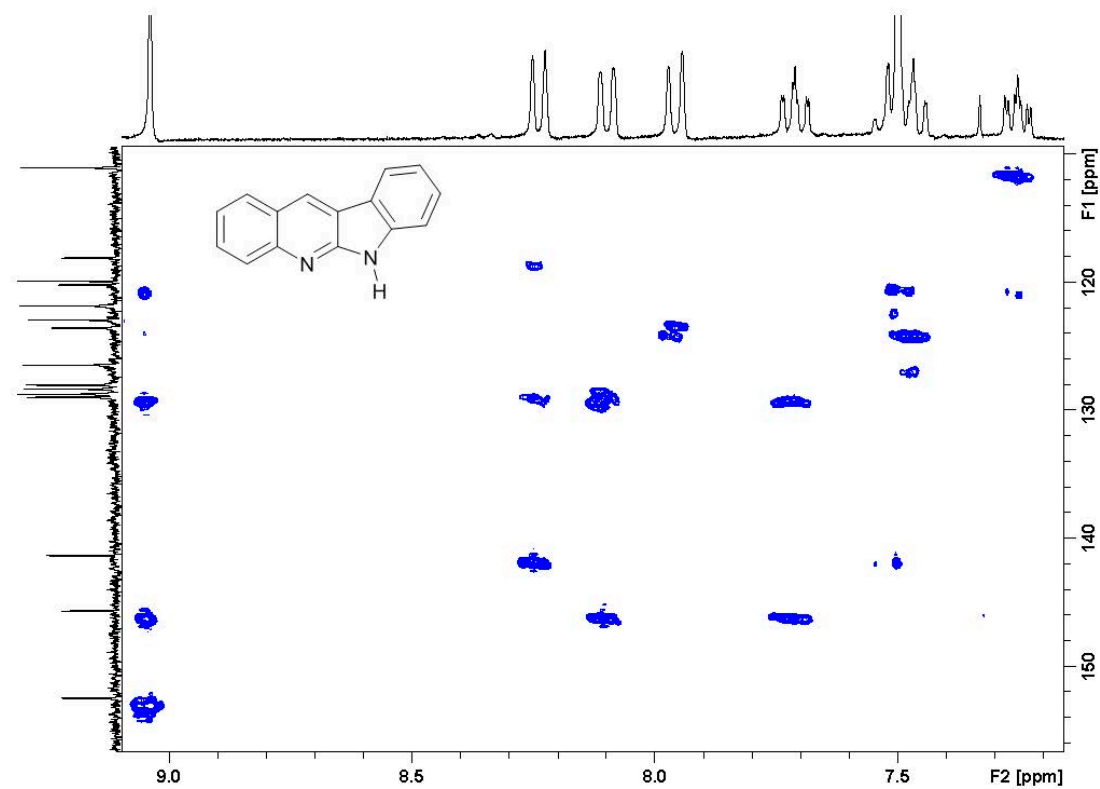

**Figure S20.** COSY (top) and HMBC (bottom) spectra of compound **8** in DMSO-*d*<sub>6</sub>.

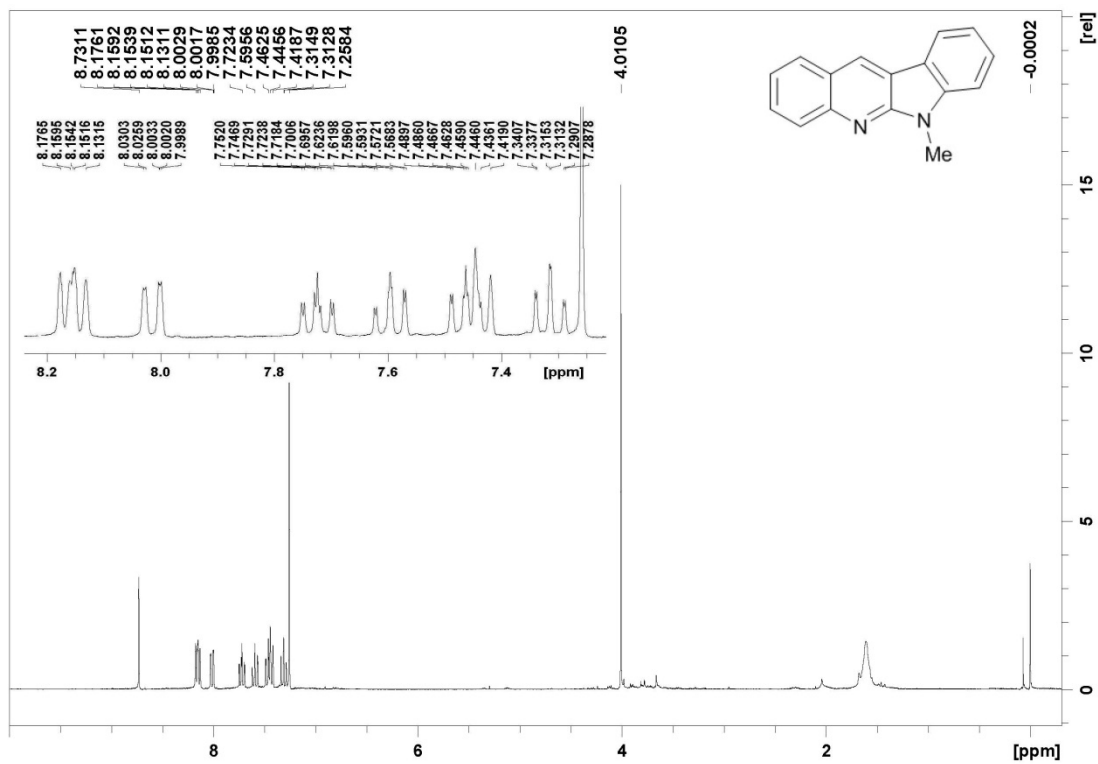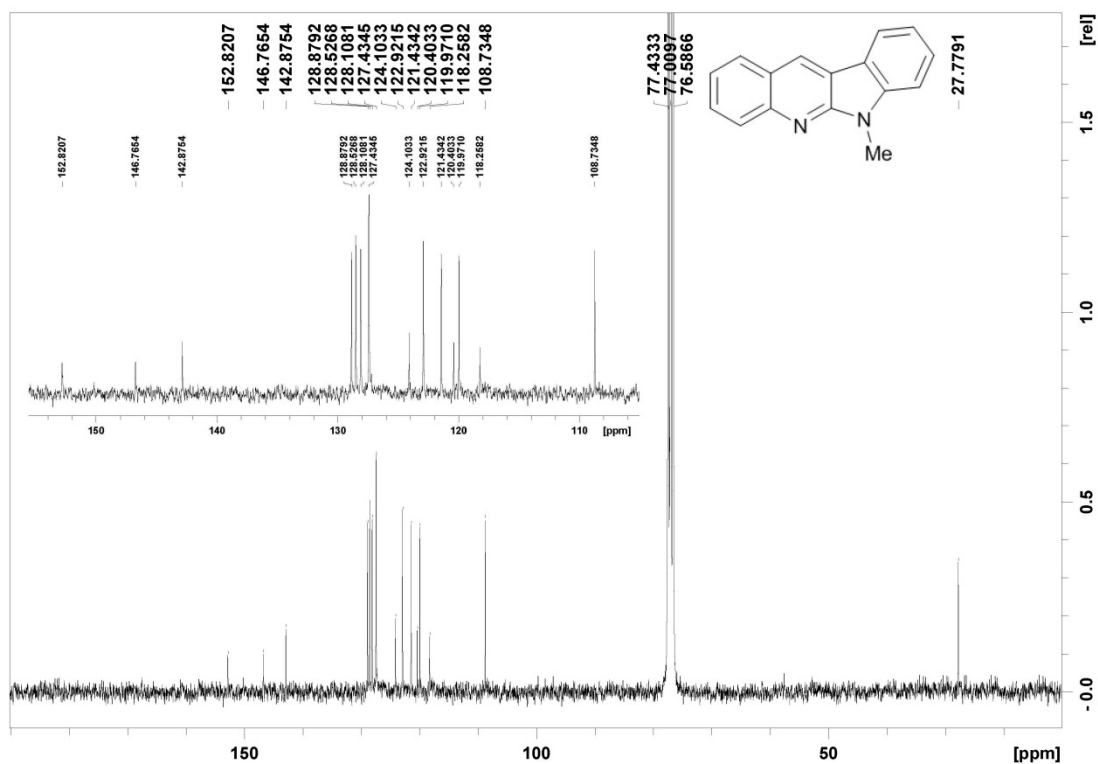

**Figure S21.** <sup>1</sup>H (top) and <sup>13</sup>C (bottom) NMR spectra of compound **10** in CDCl<sub>3</sub>.

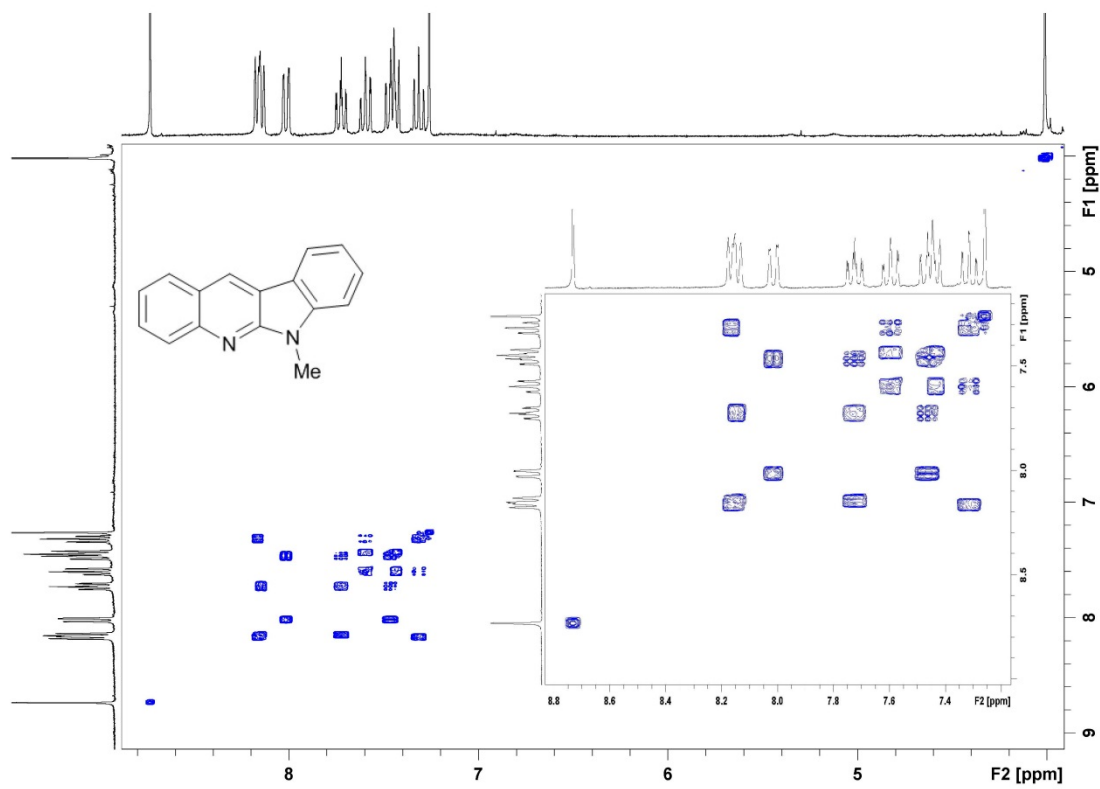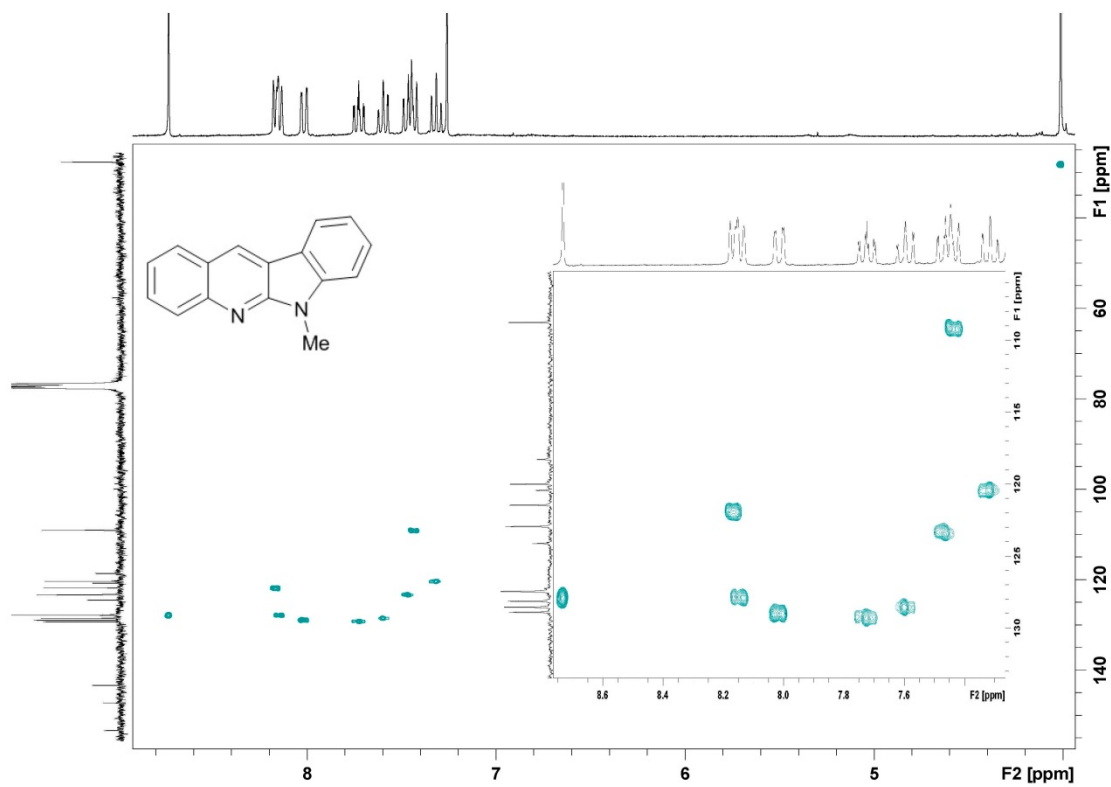

**Figure S22.** COSY (top) and HSQC (bottom) spectra of compound **10** in CDCl<sub>3</sub>.



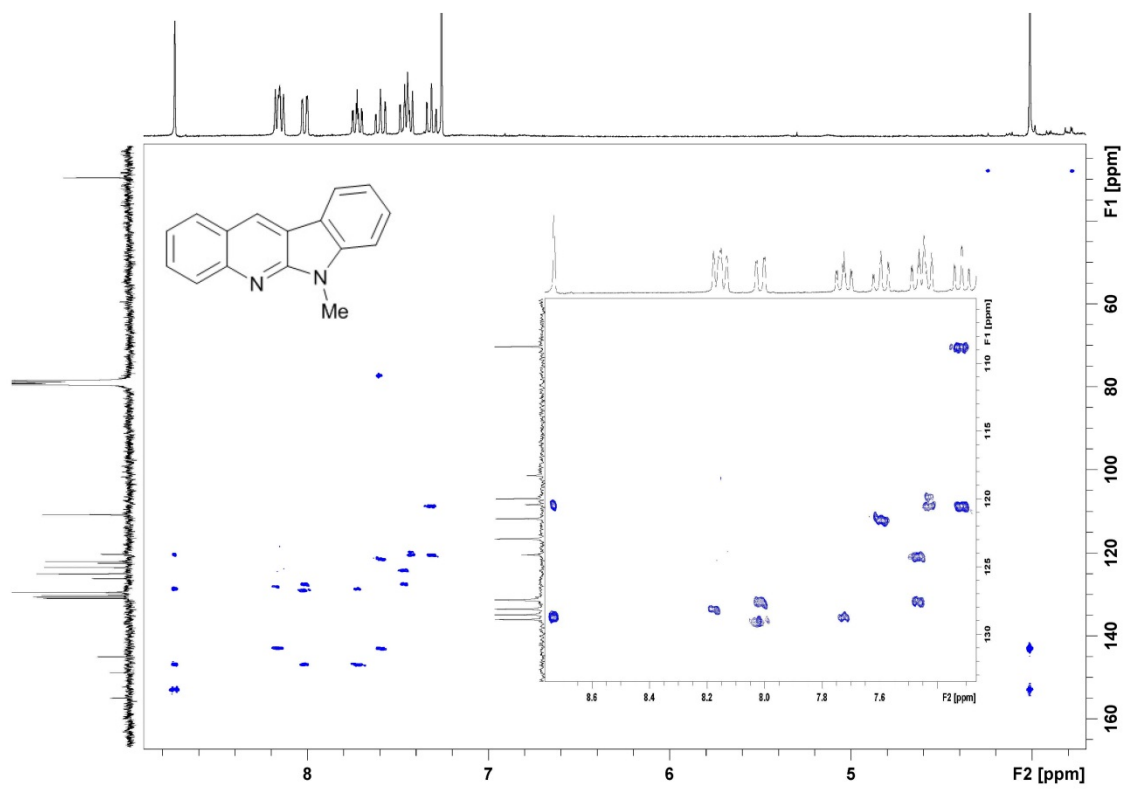

**Figure S23.** HMBC spectrum of compound **10** in CDCl<sub>3</sub>.

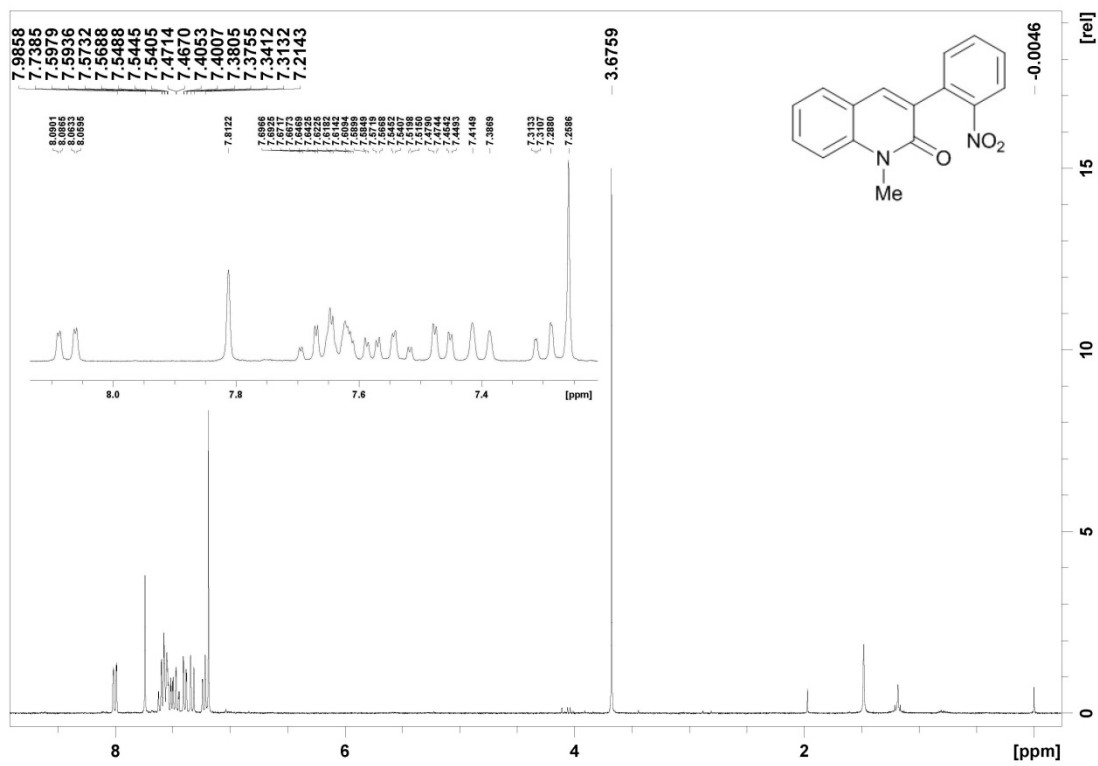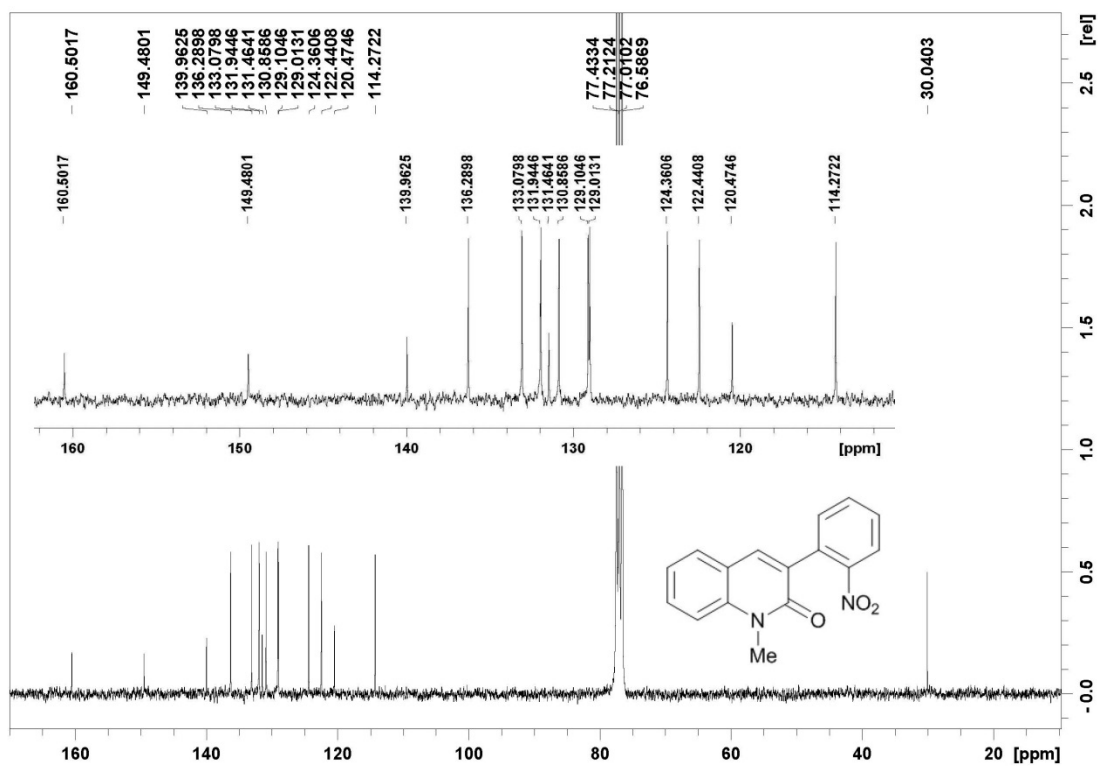

**Figure S24.** <sup>1</sup>H (top) and <sup>13</sup>C (bottom) NMR spectra of compound **14** in CDCl<sub>3</sub>.

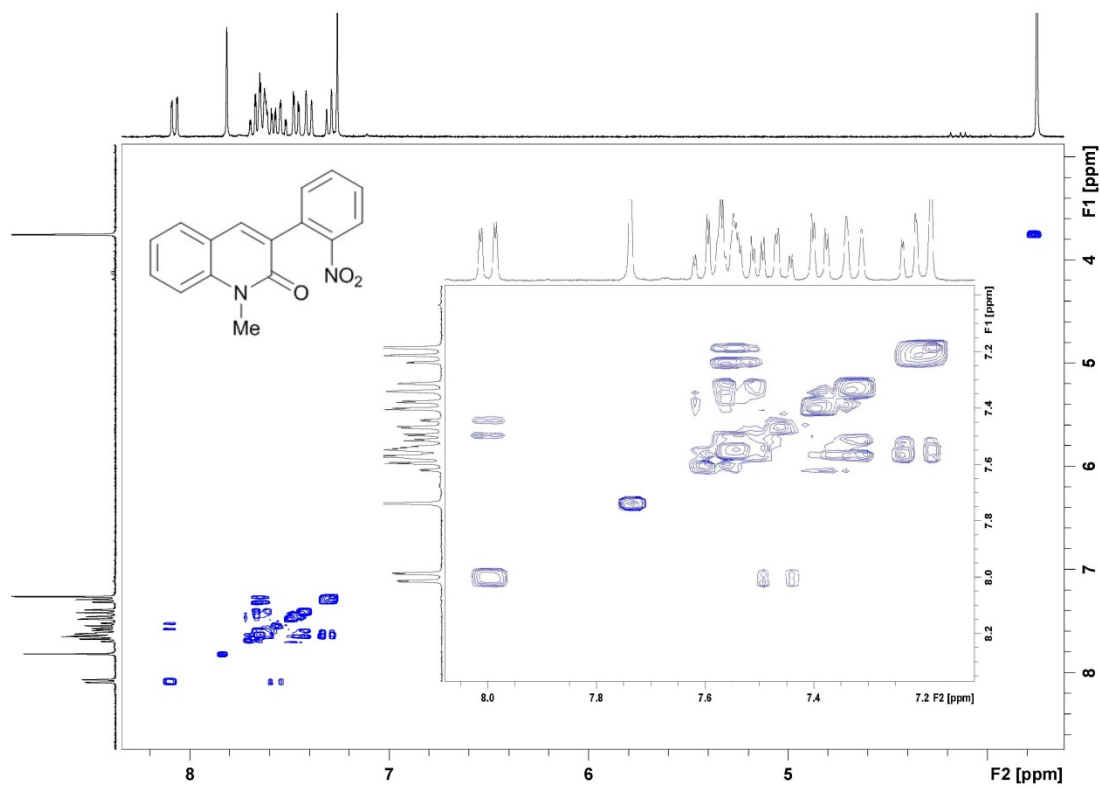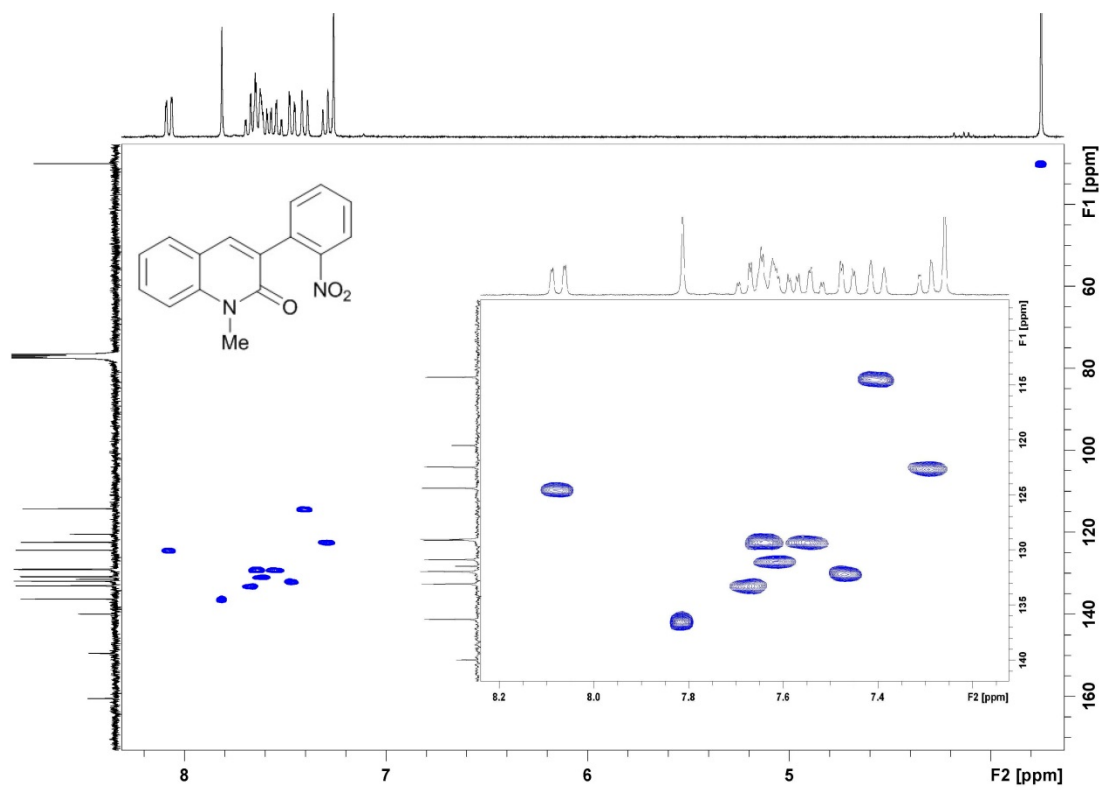

Figure S25. COSY (top) and HSQC (bottom) spectra of compound 14 in CDCl<sub>3</sub>.

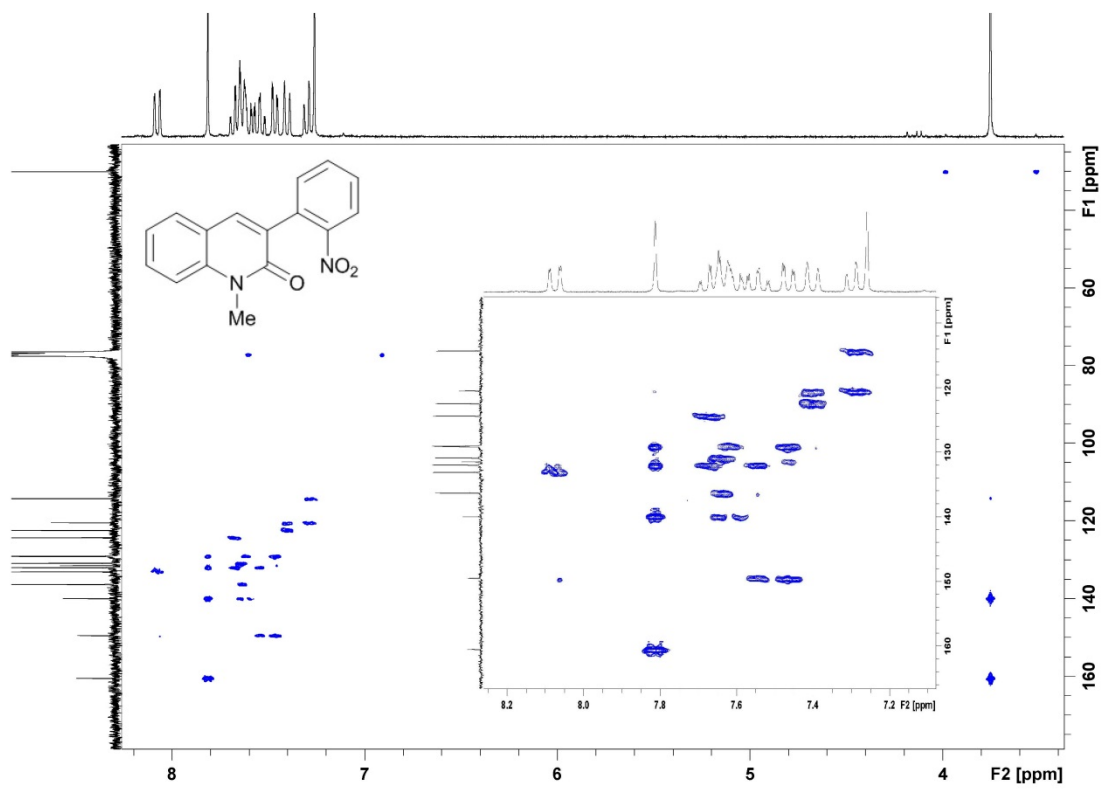

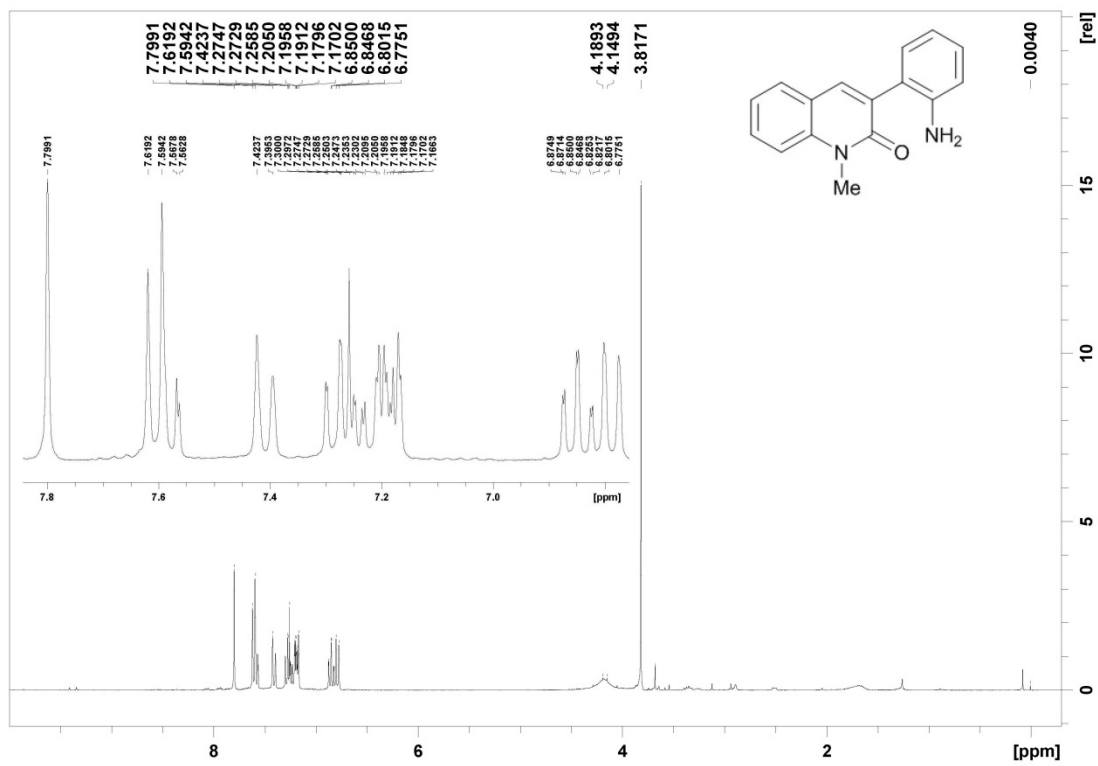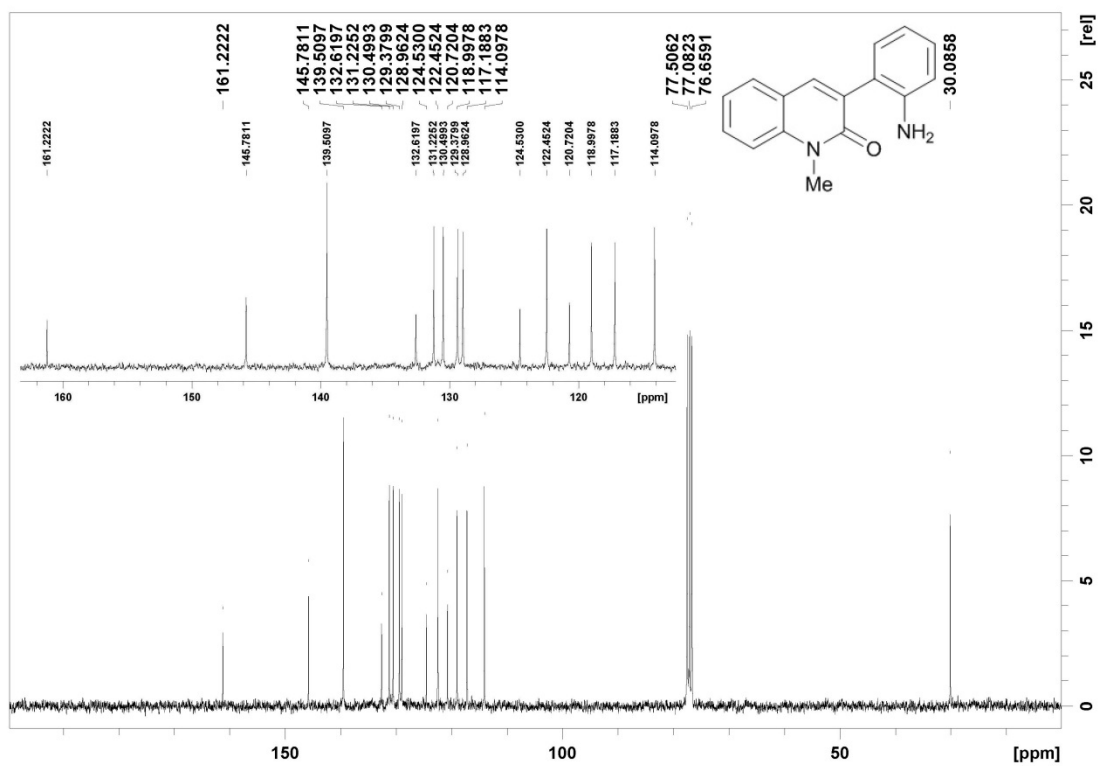

**Figure S27.** <sup>1</sup>H (top) and <sup>13</sup>C (bottom) NMR spectra of compound **19** in CDCl<sub>3</sub>.

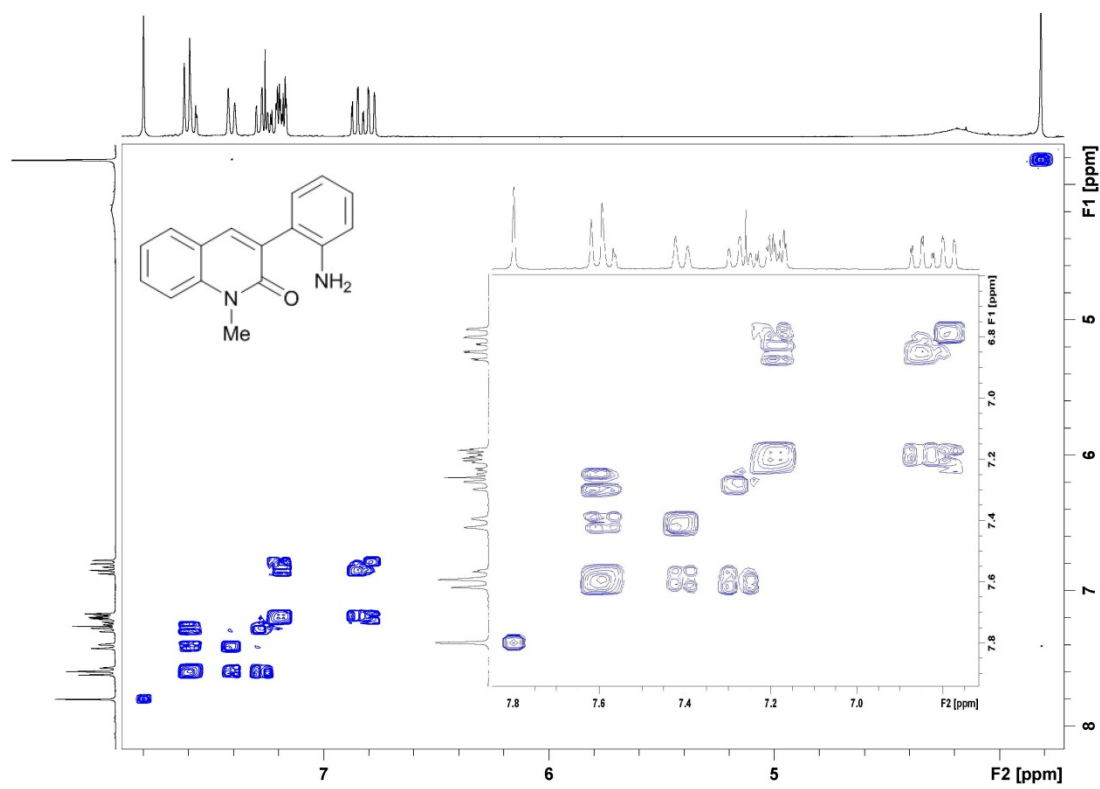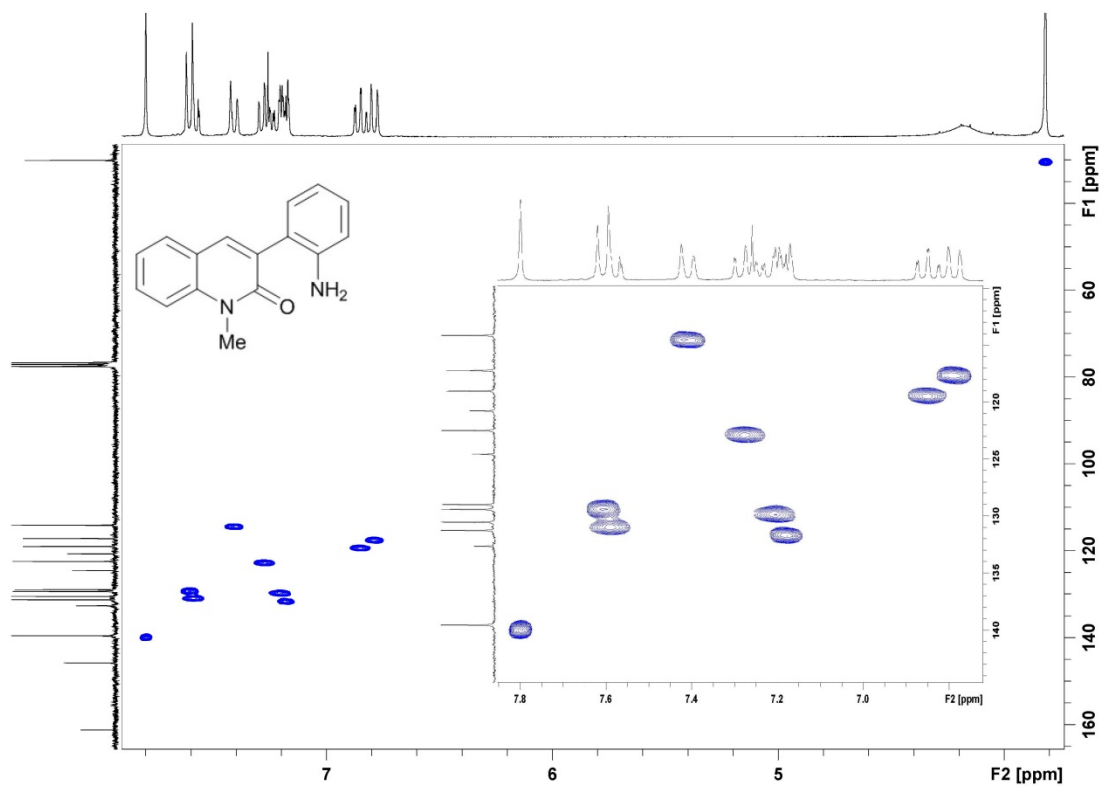

**Figure S28.** COSY (top) and HSQC (bottom) spectra of compound **19** in CDCl<sub>3</sub>.

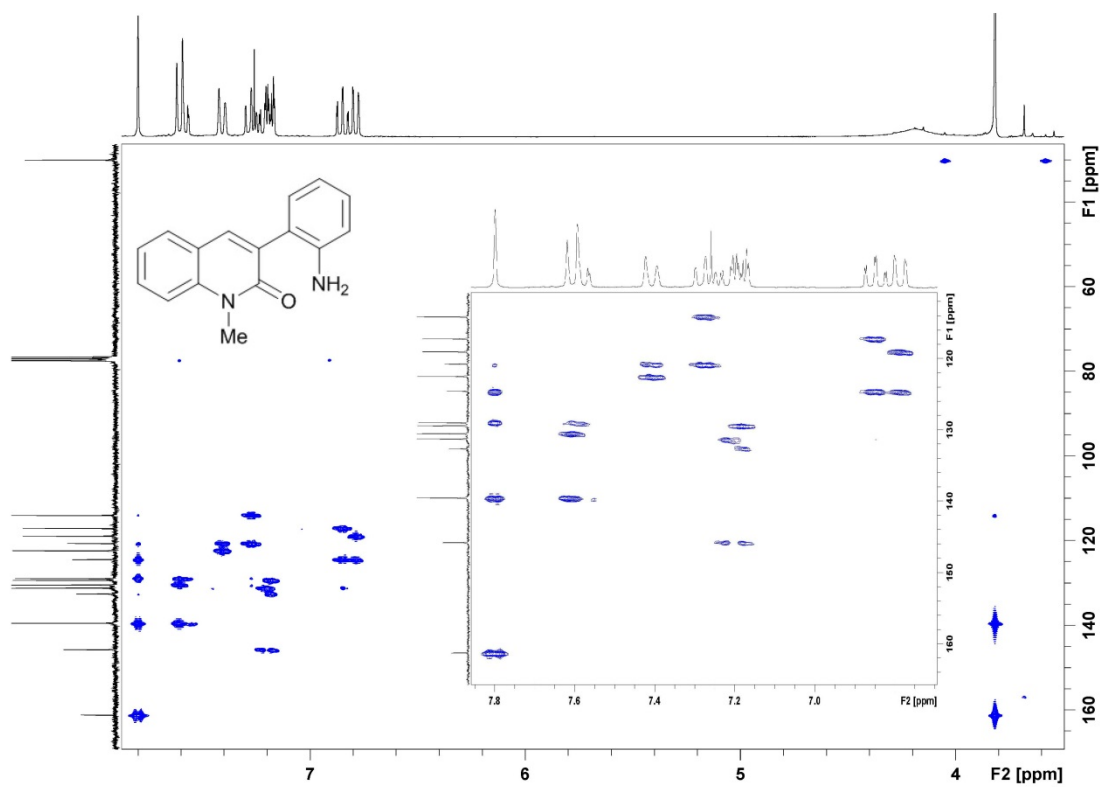

**Figure S29.** HMBC spectrum of compound **19** in CDCl<sub>3</sub>.

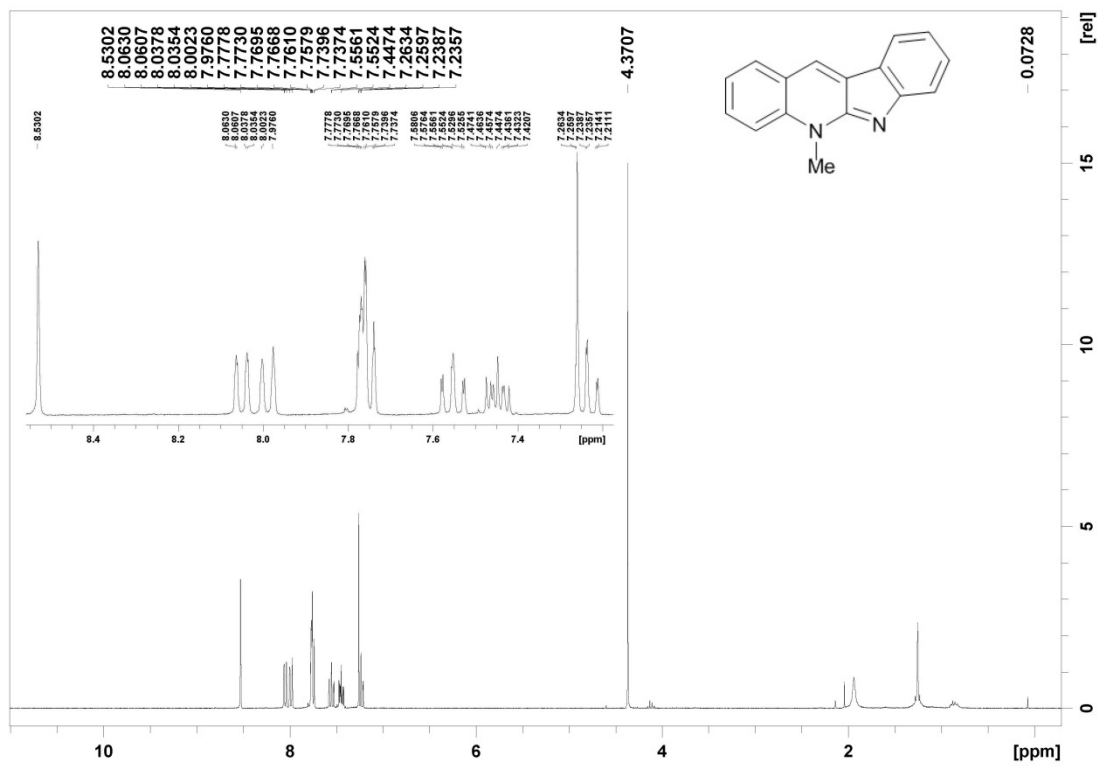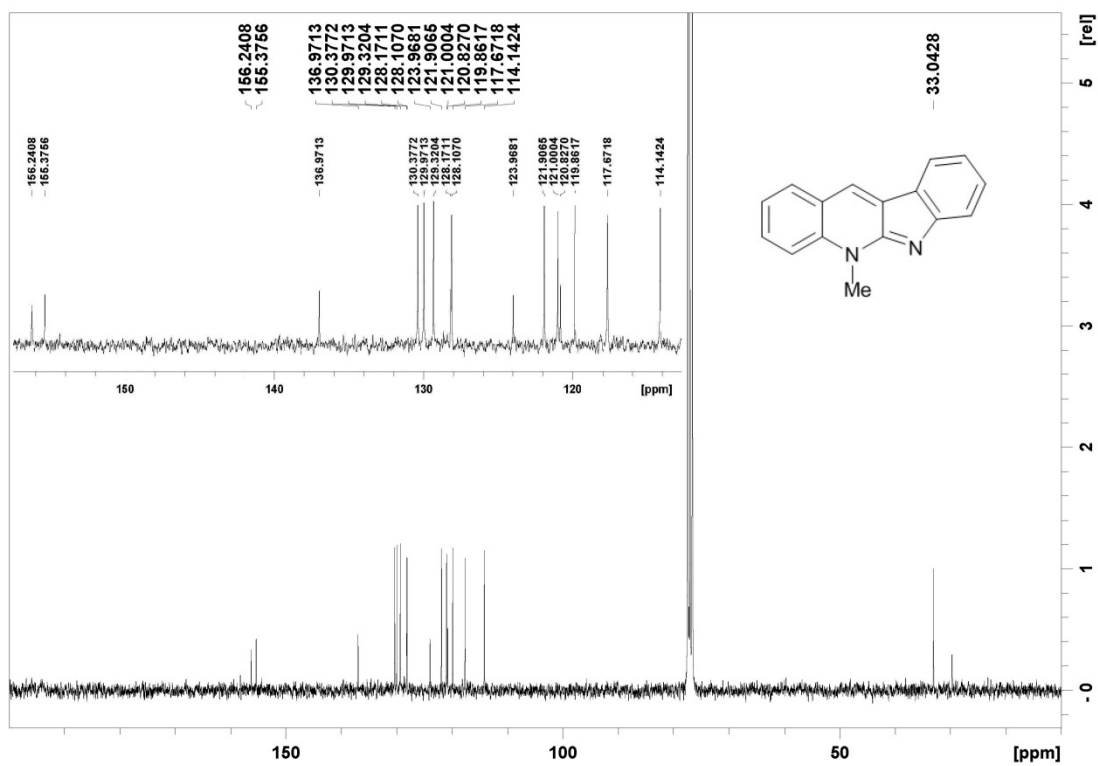

Figure S30. <sup>1</sup>H (top) and <sup>13</sup>C (bottom) NMR spectra of compound 1 in CDCl<sub>3</sub>.



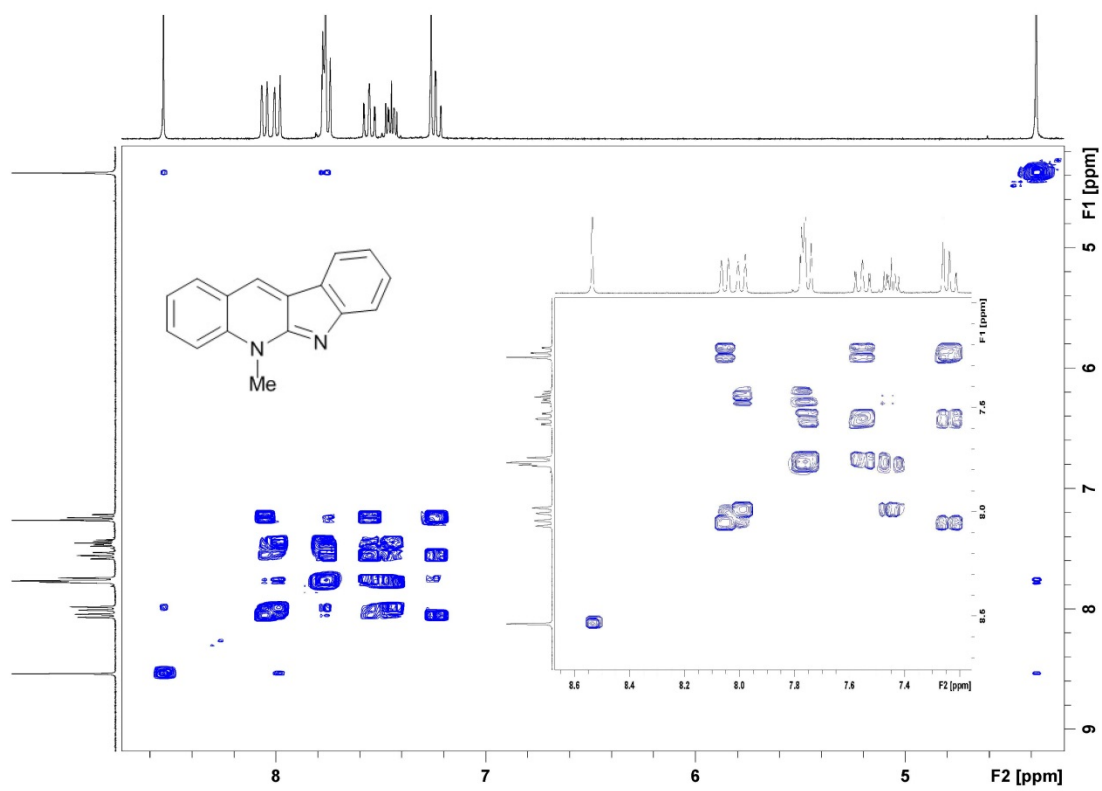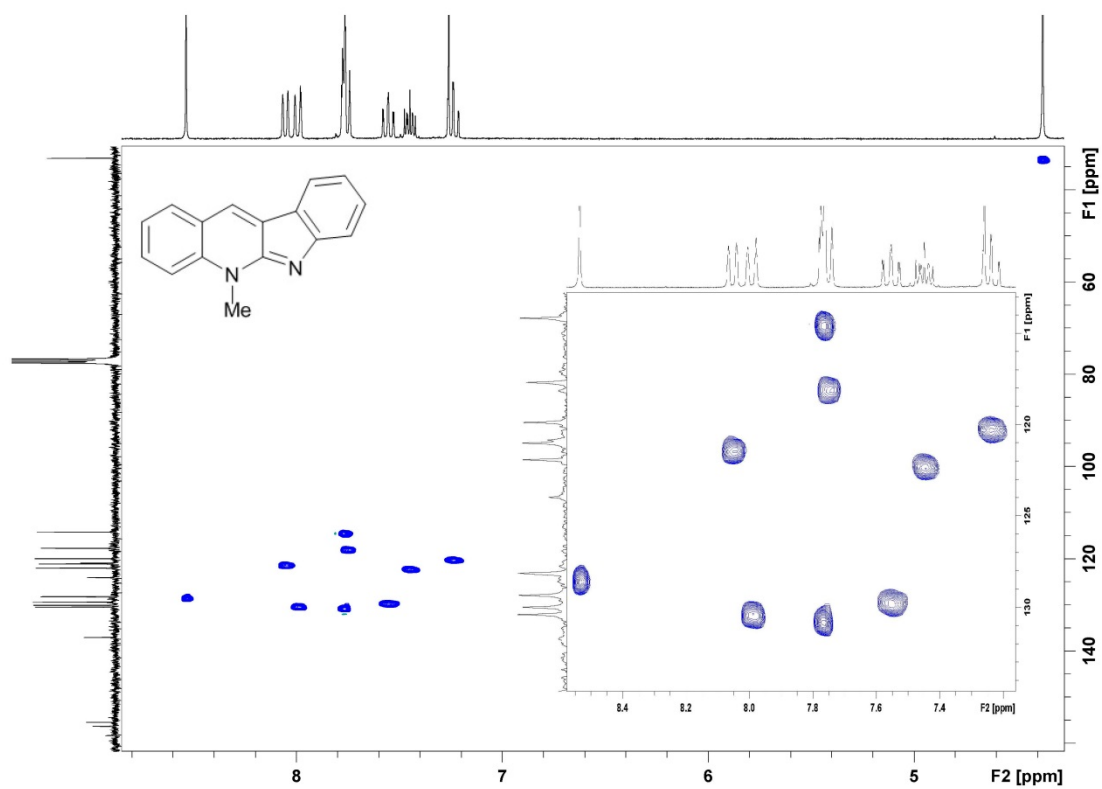

**Figure S31.** COSY (top) and HSQC (bottom) spectra of compound 1 in CDCl<sub>3</sub>.

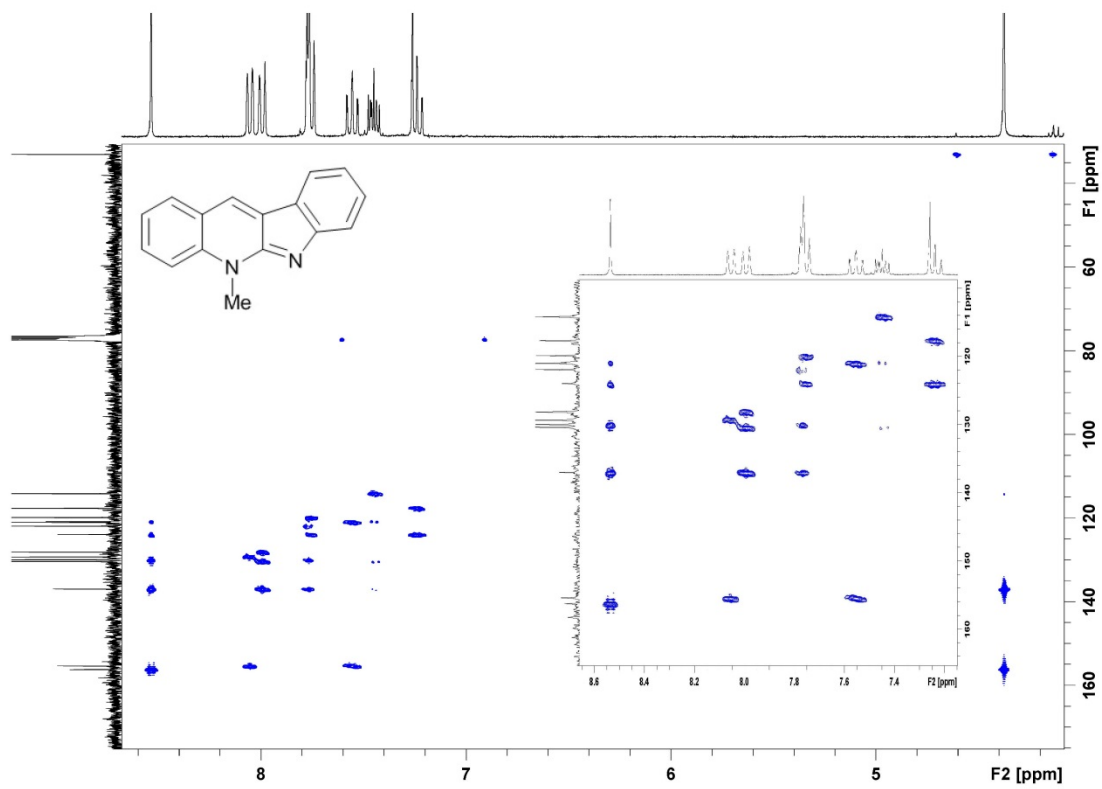

Figure S32. HMBC spectrum of compound **1** in  $\text{CDCl}_3$ .
